# Supplementary material for: Does Tafel Analysis Make Sense for Water Oxidation at Metal Oxide/Oxyhydroxide Electrocatalysts?
Source: Research Square preprint supplement (doi:10.21203/rs.3.rs-3105001/v1), 2023-06-26
Supplement: Supplementary file 1 [file 14d5d695ebd15ba19db9ac94.pdf]

Supplementary information for:

Does Tafel Analysis Make Sense for Water  
Oxidation at Metal Oxide/Oxyhydroxide  
Electrocatalysts?

Wenhua Leng<sup>1\*</sup>

Department of Chemistry, Zijingang Campus, Zhejiang University, Hangzhou,  
Zhejiang 310058, China

**Contents:**

|                                                                |   |
|----------------------------------------------------------------|---|
| Supplementary Note 1.....                                      | 4 |
| Origin of equation 3 in the main text.....                     | 4 |
| Supplementary Note 2.....                                      | 5 |
| Temperature dependence of rate law .....                       | 5 |
| Supplementary Note 3.....                                      | 5 |
| Linear versus Gaussian function.....                           | 5 |
| Supplementary Note 4.....                                      | 6 |
| Rate law in terms of current and external bias potential ..... | 6 |
| Supplementary Figures.....                                     | 9 |

---

\* Email: [lengwh@zju.edu.cn](mailto:lengwh@zju.edu.cn)

|                                                                                                                                                                         |    |
|-------------------------------------------------------------------------------------------------------------------------------------------------------------------------|----|
| Supplementary Fig. 1   Rotation speed dependent electrocatalytic response of IrO <sub>x</sub> /Ti-250°C..                                                               | 9  |
| Supplementary Fig. 2   Measured electrocatalytic response of IrO <sub>x</sub> /Ti-450°C..                                                                               | 11 |
| Supplementary Fig. 3   Measured electrocatalytic response of used IrO <sub>x</sub> /Ti-450°C. ....                                                                      | 14 |
| Supplementary Fig. 4   Measured electrocatalytic response of IrNi/Ti. ....                                                                                              | 17 |
| Supplementary Fig. 5   Measured electrocatalytic response of IrNi/GC.....                                                                                               | 20 |
| Supplementary Fig. 6   Measured electrocatalytic response of Alfa-Aesar IrO <sub>x</sub> ..                                                                             | 22 |
| Supplementary Fig. 7   Measured electrocatalytic response of Alfa-Aesar IrO <sub>x</sub> post-Deacon.....                                                               | 25 |
| Supplementary Fig. 8   Measured electrocatalytic response of IrO <sub>x</sub> /Ti-250°C. ....                                                                           | 28 |
| Supplementary Fig. 9   Total charge of selected samples. ....                                                                                                           | 30 |
| Supplementary Fig. 10   Electrochemical response of NiFe LDH..                                                                                                          | 30 |
| Supplementary Fig. 11   Measured electrocatalytic response of doped nickel oxides. ..                                                                                   | 31 |
| Supplementary Fig. 12   Measured electrocatalytic response of NiOOH/FTO electrode.                                                                                      | 33 |
| Supplementary Fig. 13   Measured electrocatalytic response of Ni/FTO electrode..                                                                                        | 34 |
| Supplementary Fig. 14   Measured electrocatalytic response of IrO <sub>x</sub> /FTO..                                                                                   | 35 |
| Supplementary Fig. 15   Potential and corresponding accumulated charge decay for Co <sub>3</sub> O <sub>4</sub> electrode.....                                          | 36 |
| Supplementary Fig. 16   Simulation of equation 4 in the main text..                                                                                                     | 37 |
| Supplementary Fig. 17   Potential and corresponding accumulated charge decay for Fe <sub>0.1</sub> Ni <sub>0.9</sub> O electrode.....                                   | 38 |
| Supplementary Tables .....                                                                                                                                              | 39 |
| Table S1. Gauss fitting parameters for H <sub>2</sub> O and H <sub>2</sub> O <sub>2</sub> oxidation on IrO <sub>x</sub> electrodes <sup>a</sup> .....                   | 39 |
| Table S2. <i>i</i> - <i>E</i> curve fitting parameters for H <sub>2</sub> O and H <sub>2</sub> O <sub>2</sub> oxidation on IrO <sub>x</sub> electrodes <sup>a</sup> . . | 39 |
| Table S3. Gauss fitting parameters for water oxidation on FeOOH, FeOOHNiOOH and Ni(Fe)OOH electrodes <sup>a</sup> .....                                                 | 40 |
| Table S4. <i>i</i> - <i>E</i> curve fitting parameters for water oxidation on FeOOH, FeOOHNiOOH and Ni(Fe)OOH electrodes <sup>a</sup> .....                             | 40 |
| Table S5. Absorption decay curve fitting parameters for water oxidation on IrO <sub>x</sub> electrodes <sup>a</sup> .....                                               | 41 |

|                                                                                                                                                                           |    |
|---------------------------------------------------------------------------------------------------------------------------------------------------------------------------|----|
| Table S6. Absorption decay curve fitting parameters for water oxidation with H <sub>2</sub> O <sub>2</sub> on IrO <sub>x</sub> electrodes <sup>a</sup> .....              | 41 |
| Table S7. <i>i</i> - <i>Q</i> curve fitting parameters for water oxidation on IrO <sub>x</sub> /Ti electrodes at various rotation speeds <sup>a</sup> .....               | 42 |
| Table S8. <i>k</i> <sub>wo</sub> - <i>Q</i> curve fitting parameters for water oxidation on IrO <sub>x</sub> /Ti electrodes at various rotation speeds <sup>a</sup> ..... | 42 |
| Table S9. Gauss fitting parameters for water oxidation on IrO <sub>x</sub> /Ti electrodes at various rotation speeds <sup>a</sup> .....                                   | 42 |
| Table S10. <i>i</i> - <i>E</i> curve fitting parameters for water oxidation on IrO <sub>x</sub> /Ti electrodes at various rotation speeds <sup>a</sup> .....              | 43 |
| Table S11. <i>i</i> - <i>Q</i> curve fitting parameters for water oxidation on doped nickel oxides <sup>a</sup> ....                                                      | 43 |
| Table S12. <i>k</i> <sub>wo</sub> - <i>Q</i> exponential fitting parameters for water oxidation on doped nickel oxides <sup>a</sup> .....                                 | 43 |
| Table S13. Gauss fitting parameters for water oxidation on doped nickel oxides <sup>a</sup> .....                                                                         | 44 |
| Table S14. <i>i</i> - <i>E</i> curve fitting parameters for water oxidation on doped nickel oxides <sup>a</sup> .....                                                     | 44 |
| Table S15. <i>i</i> - <i>Q</i> curve fitting parameters for water electrooxidation on IrO <sub>x</sub> /FTO <sup>a</sup> .....                                            | 45 |
| Table S16. <i>k</i> <sub>wo</sub> - <i>Q</i> exponential fitting parameters for water electrooxidation on IrO <sub>x</sub> /FTO <sup>a</sup> .....                        | 45 |
| Table S17. Absorption decay curve fitting parameters for water electrooxidation on IrO <sub>x</sub> /FTO <sup>a</sup> .....                                               | 46 |
| Supplementary References .....                                                                                                                                            | 46 |

## Supplementary Note 1

### *Origin of equation 3 in the main text*

Theory calculation<sup>1</sup> indicates that the rate-determining inner-sphere reaction step (O–O coupling) for OER involves the reaction between the oxidative charge (Q) in the catalysts and H<sub>2</sub>O or OH<sup>–</sup>, thus the OER rate would increase with the concentration of the oxidative charges. Also, theory calculation<sup>1</sup> demonstrates that the activation energy ( $E_a$ ) for O–O coupling obeys the Brønsted-Evans-Polanyi (BEP) relationship, with  $E_a$  depending linearly on a heat of reaction ( $\Delta H_{\text{rxn}}$ ), which in turn is controlled by oxidative charge (rather than the capacitive). Thus the  $E_a$  for O–O coupling can then be written as **equation S1**, where  $\zeta$  and  $\kappa$  are constant and the analogues of the Brønsted-Evans-Polanyi (BEP) slope and intercept, respectively. Inserting this equation into Arrhenius equation produces the rate constant which is therefore oxidative charge density dependent. Thus the rate equation can be written as **equation 3** in the main text and reproduced here (**equation S2**) for convenience, where  $C_1$  is the pre-exponential factor in Arrhenius equation,  $k_0$  is constant and equals  $k_0 = C_1 \exp\left(\frac{\kappa}{\kappa_B T}\right)$ . Note that electron charge is negative and thus the value of  $A$  is positive and equals  $q/(\kappa_B T C_a)$ .

$$E_a = \zeta Q + \kappa \quad (\text{S1})$$

$$i = k_{\text{WO}} Q = C_1 \exp\left(-\frac{\zeta Q + \kappa}{\kappa_B T}\right) Q = k_0 \exp(qQ/(\kappa_B T C_a)) Q = k_0 \exp(AQ) Q \quad (\text{S2})$$

Particular note that **equation S2** can be formally written as **equation S3**, where  $C_H$  is the Helmholtz capacitance,  $\varphi_H$  is the potential drop across the Helmholtz layer ( $\varphi_H = Q/C_H$ ) and  $A'$  equals  $q/(\kappa_B T C_H)$ . **Equation S3** looks like a Tafel kinetic

equation, which focuses on electron transfer, can only apply to outer-sphere single electron transfer (out-sphere theory, with a large reorganizational energy and neglecting cathodic reaction current, Marcus theory reduces to the Butler–Volmer and thus Tafel equation). This similarity in form can partly explain why models of outer-sphere are capably and commonly applied to inner-sphere electrocatalysis as addressed in details in the main text, though there is the tremendous mechanistic distinction.

$$i = k_0 \exp(qQ/(\kappa_B T C_H)) Q = k_0 \exp(q\varphi_H/(\kappa_B T)) Q = k_0 \exp(A'Q) Q \quad (\text{S3})$$

## Supplementary Note 2

### *Temperature dependence of rate law*

According to **equation 3** in the main text, the natural logarithm of the OER current and  $i/Q$  can be written as **equation S4** and **S5**, respectively. Thus plotting the natural logarithm of the current or  $\ln(i/Q)$  versus the inverse of the temperature at a given oxidative charge density would be linear, assuming a constant  $k_0$ .

$$\ln(i) = \ln(k_0) + \ln(Q) + qQ/(TC_H\kappa_B) \quad (\text{S4})$$

$$\ln(i/Q) = \ln(k_0) + qQ/(TC_H\kappa_B) \quad (\text{S5})$$

## Supplementary Note 3

### *Linear versus Gaussian function*

In literature<sup>1</sup>, a linear function is used to describe the experimental data of the oxidative charge over potential. However, it fail to fit the half-bell like curve between  $Q$  and  $\eta$  (or  $E$ ), but can be accurately well-fitted by Gaussian function (**equation 4** in the main text) as shown in **Figs. 1c-4c** in the main text. Gauss function

is an exponential-like function as shown in **Supplementary Fig. 16**. It would reduce to a linear function (**equation S6**) if  $\left(\frac{E-w_3}{w_4}\right)^2 \rightarrow 0$  and  $\left(\frac{E-w_3}{w_4}\right)^2 \ll 1$  for **equation 4** in the main text. This can explain why the linear function appears to be able to fit the experimental data of oxidative charge versus potential under a certain situations.

$$Q \approx w_1 + w_2 \left[1 - \left(\frac{E-w_3}{w_4}\right)^2\right] \approx w_1 + w_2 \left(1 + \frac{E-w_3}{w_4}\right) \quad (\text{S6})$$

## Supplementary Note 4

### *Rate law in terms of current and external bias potential*

Substituting **eq 4** into **eq 3** in the main text, we can get a new rate law written as **equation 5** in the main text and reproduced here (**equation S7**) for convenience, which describes the relationship between  $i$  and  $E$  (or  $\eta$ ). Obviously, according to **equation S7** there will be *no* traditional Tafel equation. However, if the relationship between the oxidative charge and potential is approximately described by a linear function (**equation S6**) then **equation S7** can be reduced to **equation S8**. Thus the logarithm of **equation S8** can be written as **equation S9**. Under high overpotential (high oxidative charge density) where  $AQ \gg \ln Q$ , **equation S8** can be written as **equation S10** in a Tafel-like form, where  $a = w_3 - \frac{2.3w_4}{Aw_2} [\log(k_0) + 0.434294 A(w_1 + w_2)]$  and  $b = \frac{2.3w_4}{Aw_2}$ . This equation indicates that the applied potential is linearly proportional to the natural logarithm of the current, analogous to traditional Tafel polarization equation. This can explain why conventional Tafel equation appears to be able to fit the experimental potential versus log (current) under a certain situations. However, from **equation S10**,

it shows the so-called Tafel slope is determined by  $\frac{2.3w_4}{Aw_2}$ , which is related to  $A, w_2$  and  $w_4$  and is nothing to do with the reaction order for anodic process, while the Tafel intercept is given by  $w_3 - \frac{2.3w_4}{Aw_2} [\log(k_0) + 0.434294 A(w_1 + w_2)]$ , which is related to  $k_0, A$  and  $w_1 \sim w_4$  and is nothing to do with “exchange current density”.

Under low overpotential (low oxidative charge density) where  $AQ \ll \ln Q$ , **equation S8** can be written as **equation S11**, where  $a = w_3 - \frac{w_4}{w_2}(k_0 + w_1 + w_2)$  and  $b = \frac{w_4}{w_2}$ . This equation suggests that the current is linearly proportional to the applied, analogous to traditional linear polarization.

From these equations and their function graphs (Tafel plot), one or two straight lines can be obtained if the fitted data are selected partially as the authors<sup>1</sup> did, but it is absence of reliable theoretical basis. Tafel plot cannot be described by two intersection straight line (potential is bilinear in  $\log(\text{current})$ ) in the plot of  $E$  versus  $\log(i)$  as the authors<sup>1</sup> did, because some data cannot be on either of the lines (discontinue, see an example in **Fig. 1b** in the article<sup>1</sup>, but can be explained by my rate throughout the potential range. In addition, the reaction order of OER from 1 to 3 (even zero) can be obtained if the fitted data are selected partially as the authors<sup>1</sup> did (likewise absence of theoretical basis).

$$i = k_0 \exp \left\{ A \left\{ w_1 + w_2 \exp \left[ - \left( \frac{E-w_3}{w_4} \right)^2 \right] \right\} \right\} * \left\{ w_1 + w_2 \exp \left[ - \left( \frac{E-w_3}{w_4} \right)^2 \right] \right\} \quad (\text{S7})$$

$$i = k_0 \exp \left\{ A \left[ w_1 + w_2 \left( 1 + \frac{E-w_3}{w_4} \right) \right] \right\} * \left[ w_1 + w_2 \left( 1 + \frac{E-w_3}{w_4} \right) \right] \quad (\text{S8})$$

$$\log(i) = \log(k_0) + 0.434294 A \left[ w_1 + w_2 \left( 1 + \frac{E-w_3}{w_4} \right) \right] + \log \left( \left[ w_1 + w_2 \left( 1 + \frac{E-w_3}{w_4} \right) \right] \right) \quad (\text{S9})$$

$$E = w_3 - \frac{2.3w_4}{Aw_2} [\log(k_0) + 0.434294 A(w_1 + w_2)] + \frac{2.3w_4}{Aw_2} \log(i) = a + b \log(i) \quad (\text{S10})$$

$$E = w_3 - \frac{w_4}{w_2} (k_0 + w_1 + w_2) + \frac{w_4}{w_2} i = a + bi \quad (\text{S11})$$



## Supplementary Figures

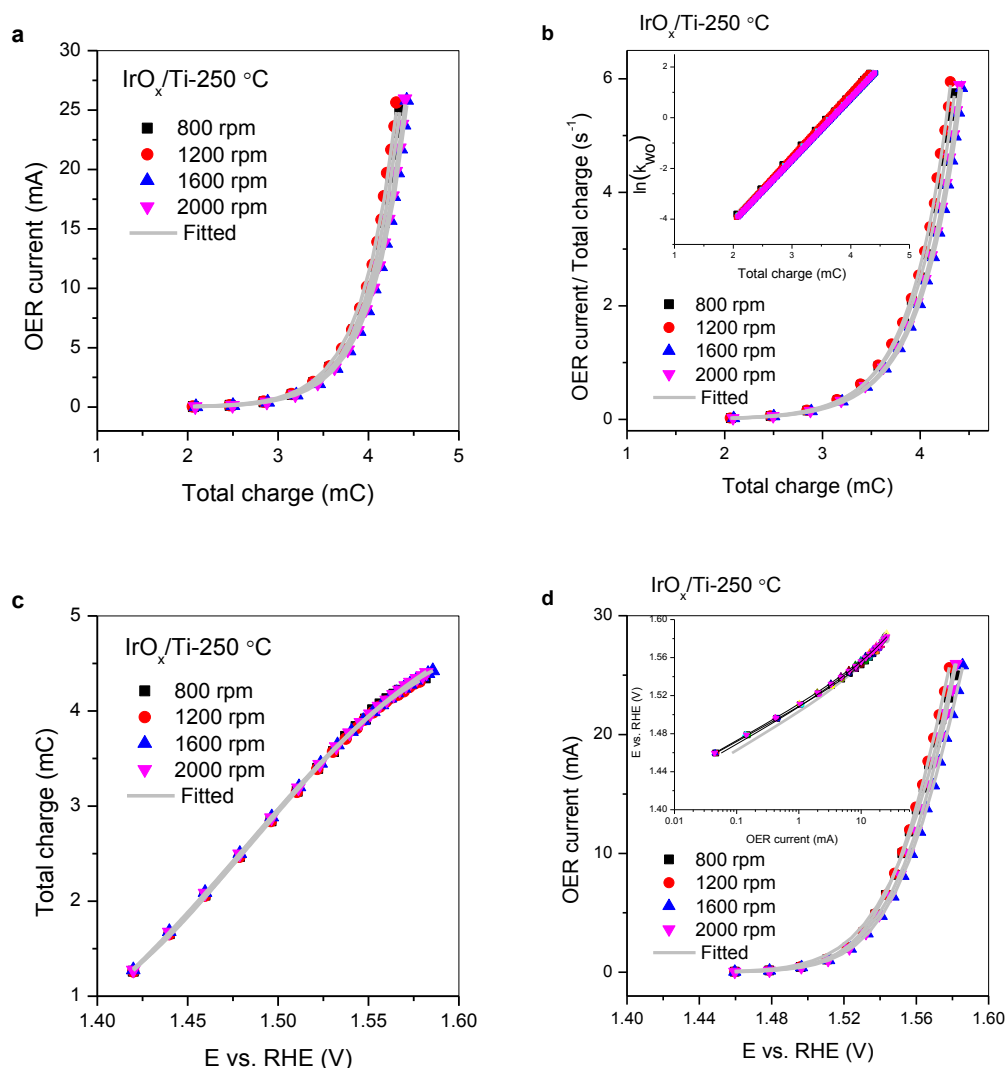

**Supplementary Fig. 1 | Rotation speed dependent electrocatalytic response of IrO<sub>x</sub>/Ti-250 °C.** **a**, OER current versus total charge (integral cathodic charge) from pulse voltammetry, the data were from the **Supplementary Fig. 18c** in the Article<sup>1</sup> and fitted by equation 3 in the main text (with results listed in **Table S7**). **b**, Corresponding relationship between OER current/Total charge (or  $k_{wo}$ ) and total charge with exponential fitting results listed in **Table S8**. **c**, Total charge (integral cathodic charge) vs.  $iR$  corrected potential from pulse voltammetry, the data were from **Supplementary Fig. 18b** in the Article<sup>1</sup> and fitted by **equation 4** in the main

text (with results listed in **Table S9**). **d**, OER current versus  $iR$  corrected potential, the data were from **Supplementary Fig. 18a** in the Article<sup>1</sup> and fitted by **equation 5** in the main text (with results listed in **Table S10**), the insert shows Tafel plot (potential versus  $\log(\text{OER current})$  in milliamperes).

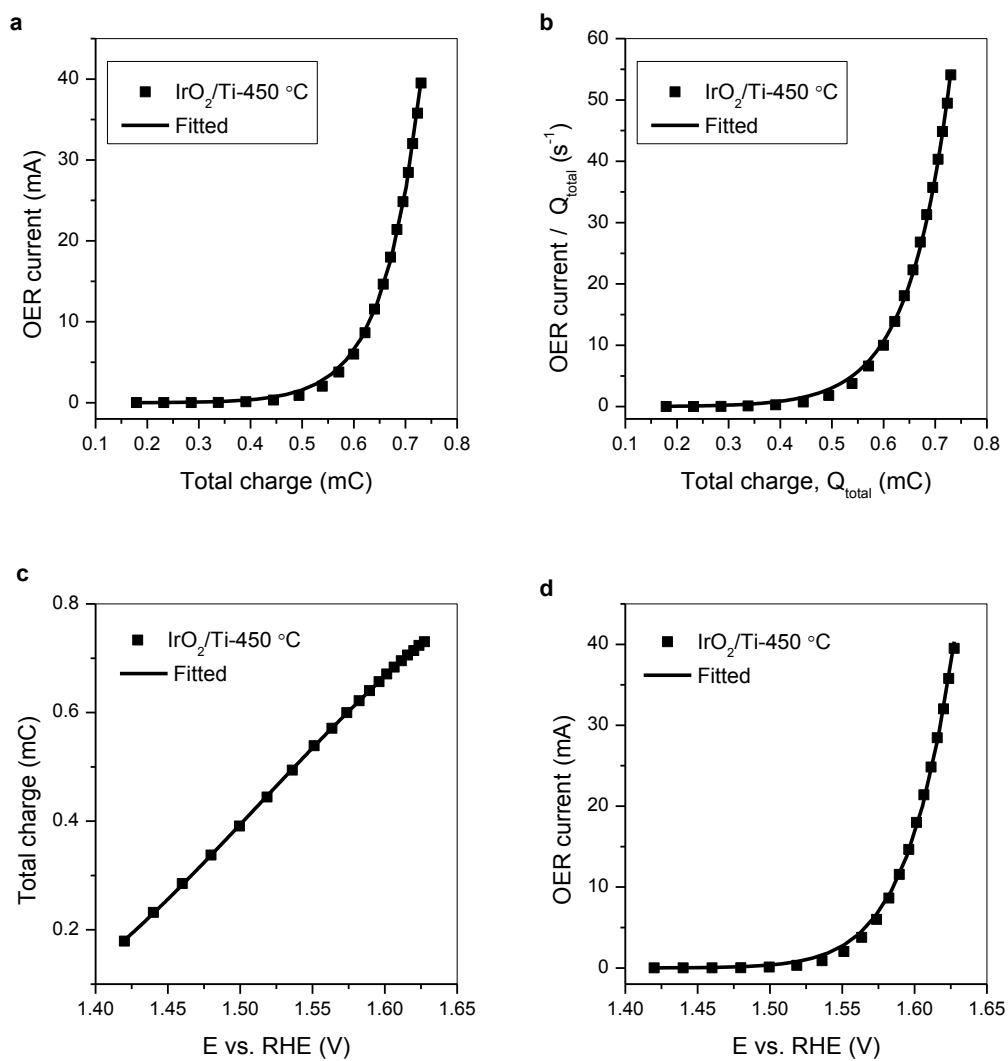

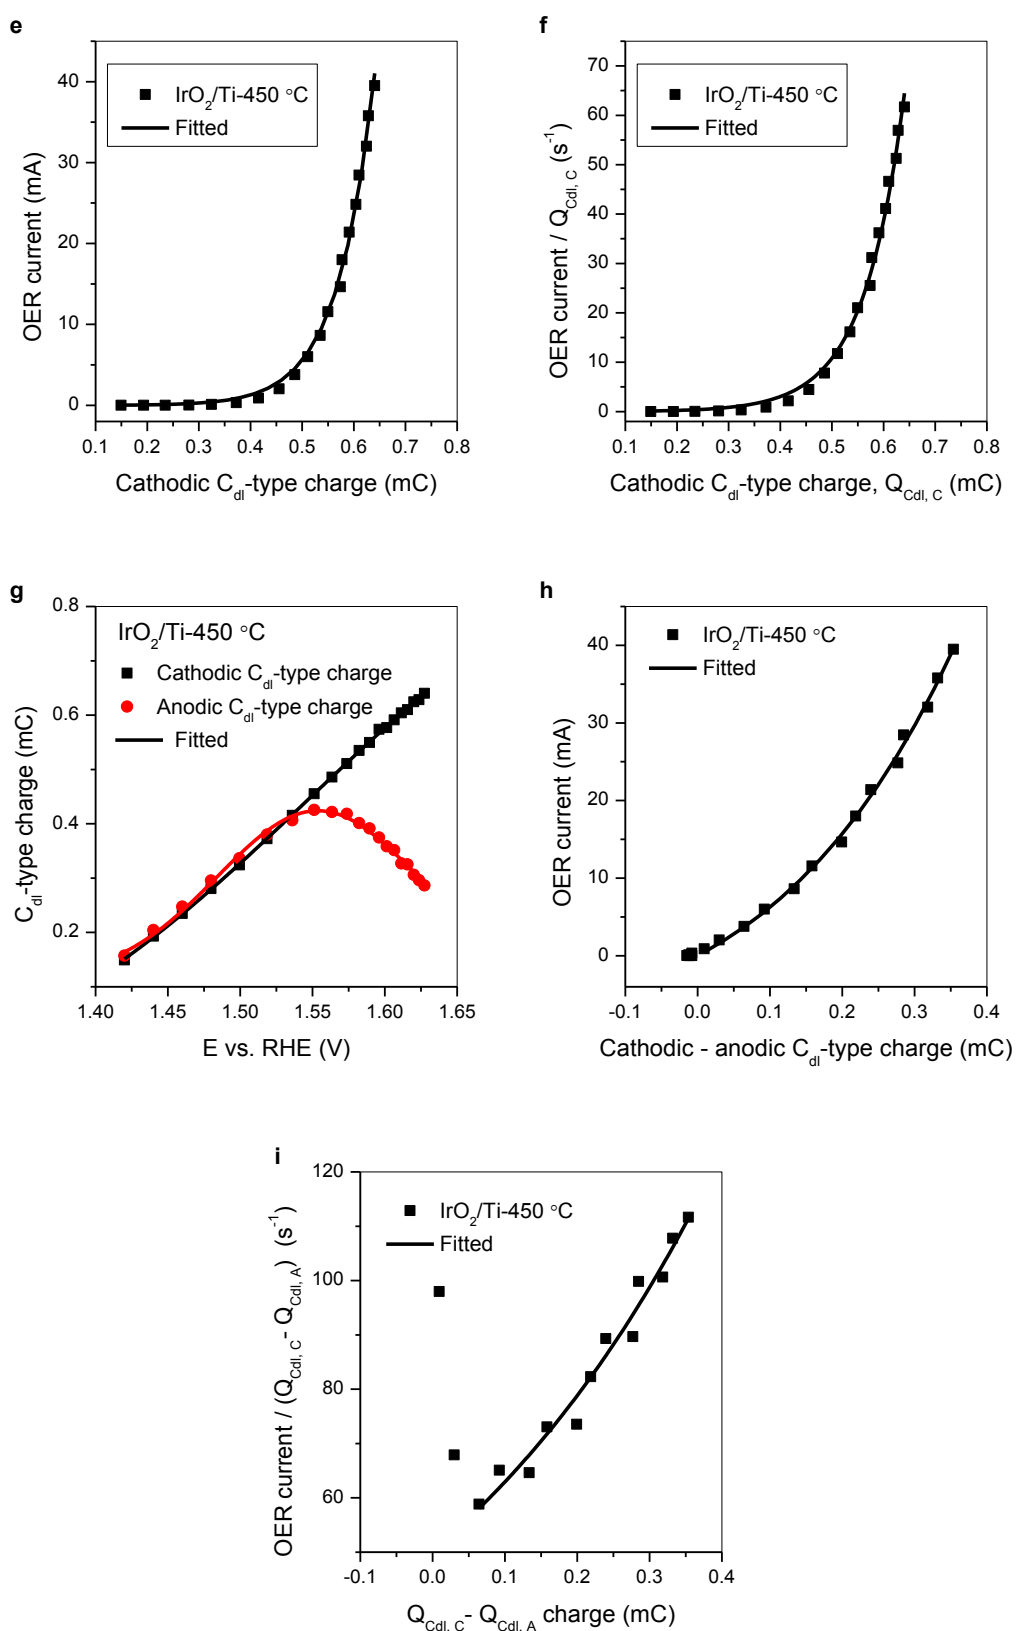

**Supplementary Fig. 2 | Measured electrocatalytic response of IrO<sub>x</sub>/Ti-450 °C. a,**

OER current versus total charge (integral cathodic charge) from pulse voltammetry, the data were from **Supplementary Fig. 2c** in the Article<sup>1</sup> and fitted by **equation 3** in the main text (with result  $i = 6.1303 \times 10^{-3} \times \exp(12.3844 \times Q) \times Q$ ). **b**, Corresponding relationship between OER current/Total charge (or  $k_{wo}$ ) and total charge with fitting result  $k_{wo} = 5.81 \times 10^{-2} \times \exp(12.52712 \times Q)$ ,  $R^2 = 0.999$ . **c**, Total charge (integral cathodic charge) vs.  $iR$  corrected potential from pulse voltammetry, the data were from **Supplementary Fig. 2b** in the Article<sup>1</sup> and fitted by **equation 4** in the main text (with result  $Q = 1.0979 - 1.1082 \times \exp[-((x - 1.2739)/0.33573)^2]$ ). **d**, OER current versus  $iR$  corrected potential, the data were from **Supplementary Fig. 2a** in the Article<sup>1</sup> and fitted by **equation 5** in the main text (with result  $i = 8.063 \times 10^{-3} \times \exp[12.0594 \times Q(E)] \times Q(E)$ ,  $Q(E)$  parameters see **Fig. c**). **e**, OER current versus cathodic  $C_{dl}$ -type charge, the data were from the **Supplementary Fig. 2d** in the Article<sup>1</sup> and fitted by **equation 3**. **f**, Corresponding relationship between OER current/cathodic  $C_{dl}$  – type charge (or  $k_{wo}$ ) and cathodic  $C_{dl}$ -type charge, fitting with a single exponential function. **g**,  $C_{dl}$ -type charge vs. the  $iR$  corrected potential, the data were from **Supplementary Fig. 2f** in the Article<sup>1</sup> and fitted by **equation 4**. **h**, OER current versus the difference between cathodic and anodic  $C_{dl}$ -type charge, the data were from **Supplementary Fig. 2g** in the Article<sup>1</sup> and fitted by **equation 3**. **i**, Corresponding relationship between OER current/the difference between cathodic and anodic  $C_{dl}$  – type charge and the difference between cathodic and anodic  $C_{dl}$ -type charge, fitting with a single exponential function. Sample: fresh  $\text{IrO}_2/\text{Ti}$ -450 °C.

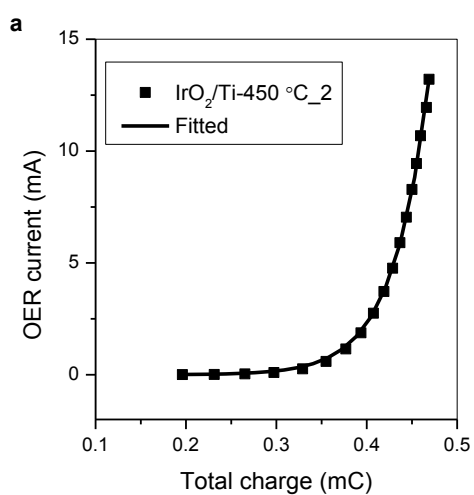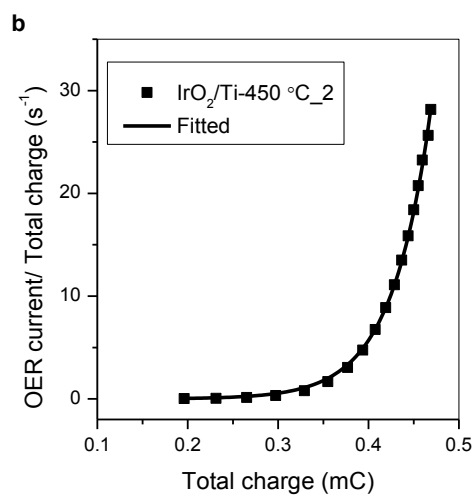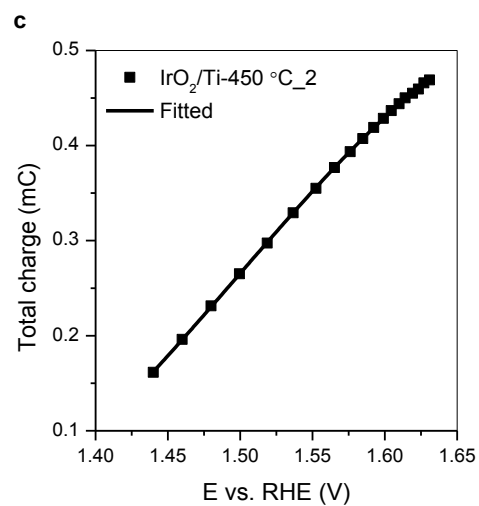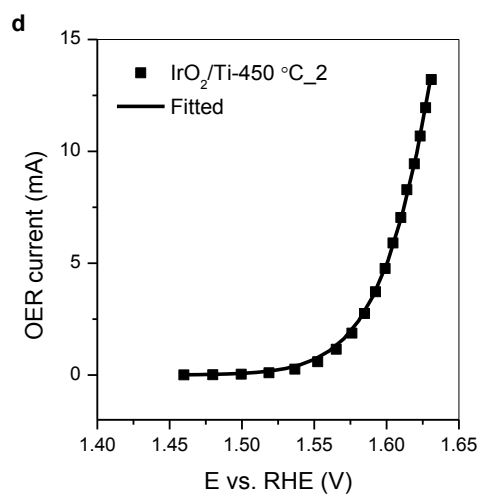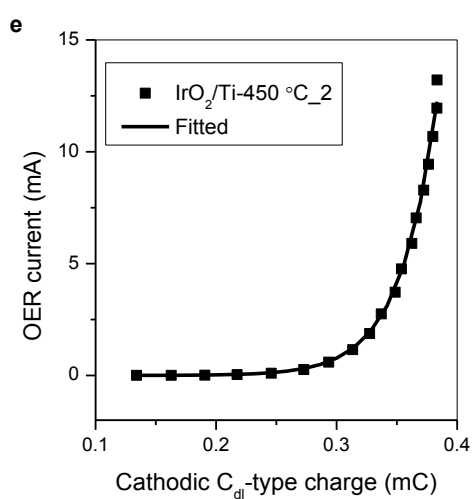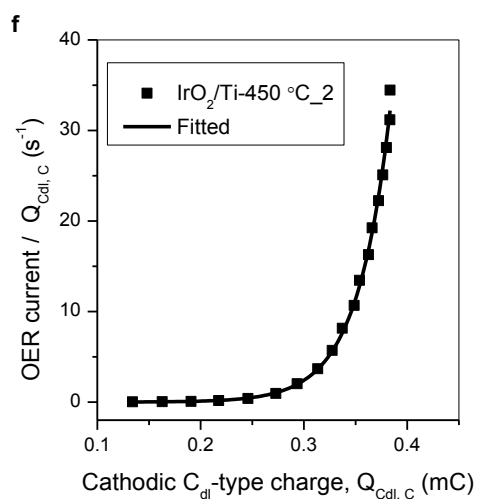

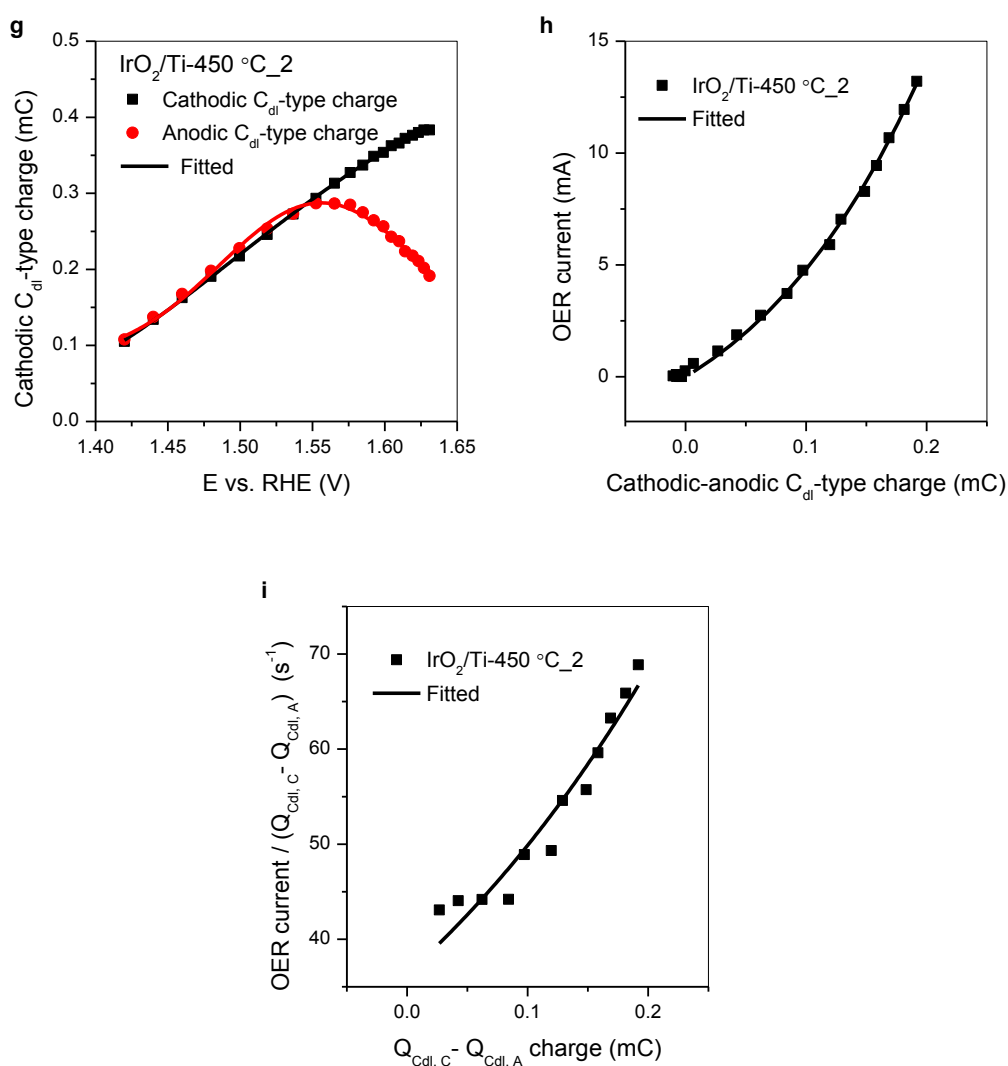

**Supplementary Fig. 3 | Measured electrocatalytic response of used IrO<sub>x</sub>/Ti-450 °C.**

**a**, OER current versus total charge (integral cathodic charge) from pulse voltammetry, the data were from **Supplementary Fig. 3c** in the Article<sup>1</sup> and fitted by **equation 3** in the main text (with result  $i = 5.61 \times 10^{-4} \times \exp(23.0818 \times Q) \times Q$ ). **b**, Corresponding relationship between OER current/Total charge (or  $k_{wo}$ ) and total charge with fitting result  $k_{wo} = 5.32 \times 10^{-4} \exp(23.19997 \times Q)$ ,  $R^2 = 0.999$ . **c**, Total charge (integral cathodic charge) vs.  $iR$  corrected potential from pulse voltammetry, the data were from **Supplementary Fig. 3b** in the Article<sup>1</sup> and fitted by **equation 4** in the main text (with result  $Q = -0.1572 + 0.69363 \times \exp[-((x - 1.7386)/$

0.33909)<sup>2</sup>]). **d**, OER current versus *iR* corrected potential, the data were from the **Supplementary Fig. 3a** in the Article<sup>1</sup> and fitted by **equation 5** in the main text (with result  $i = 6.957 \times 10^{-4} \times \exp[22.606 \times Q(E)] \times Q(E)$ ,  $Q(E)$  parameters see **Fig. c**). **e**, OER current versus cathodic  $C_{dl}$ -type charge, the data were from the **Supplementary Fig. 3d** in the Article<sup>1</sup> and fitted by **equation 3**. **f**, Corresponding relationship between OER current/cathodic  $C_{dl}$  – type charge (or  $k_{wo}$ ) and cathodic  $C_{dl}$ -type charge, fitting with a single exponential function. **g**,  $C_{dl}$ -type charge vs. the *iR* corrected potential, the data were from **Supplementary Fig. 3f** in the Article<sup>1</sup> and fitted by **equation 4**. **h**, OER current versus the difference between cathodic and anodic  $C_{dl}$ -type charge, the data were from **Supplementary Fig. 3g** in the Article<sup>1</sup> and fitted by **equation 3**. **i**, Corresponding relationship between OER current/the difference between cathodic and anodic  $C_{dl}$  – type charge and the difference between cathodic and anodic  $C_{dl}$ -type charge, fitting with a single exponential function. Sample: partially deactivated IrO<sub>2</sub>/Ti-450 °C.

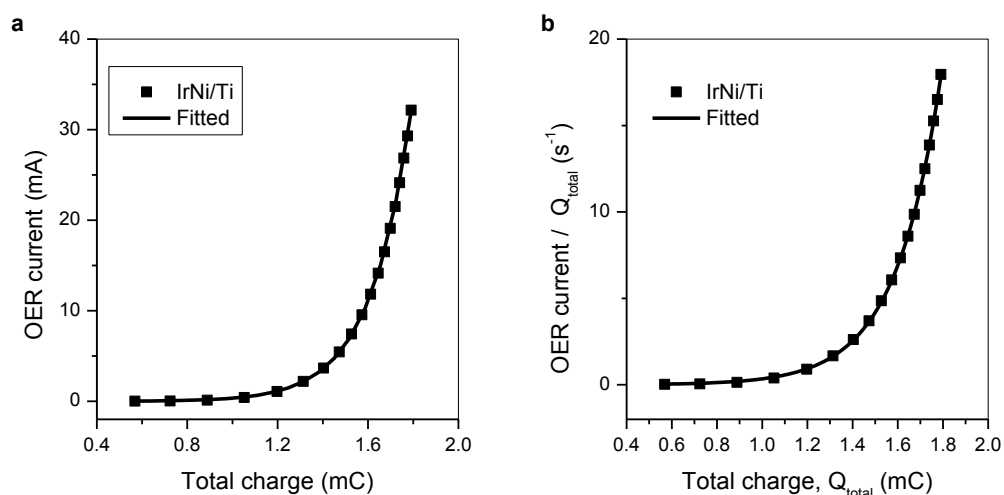

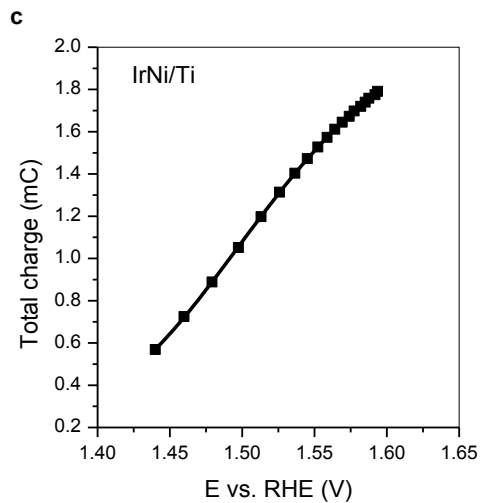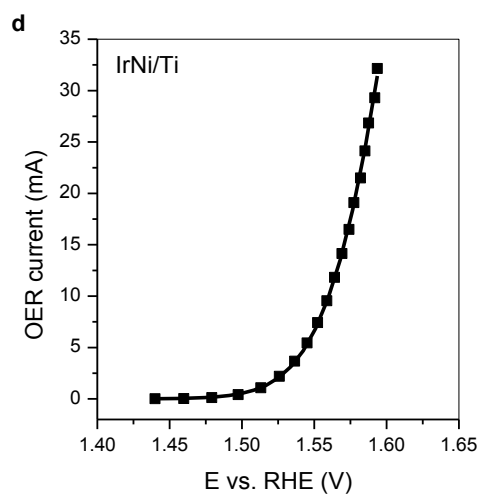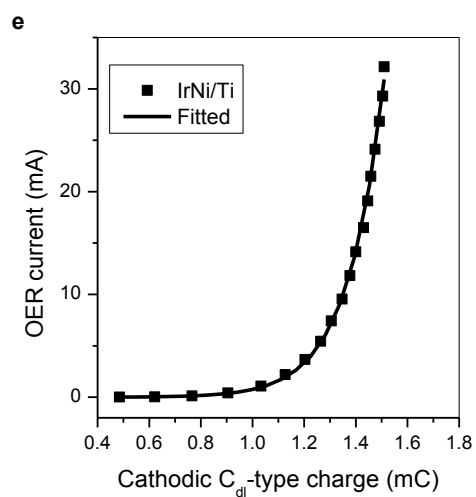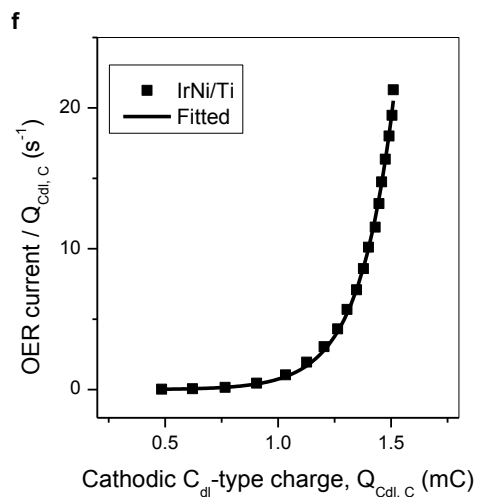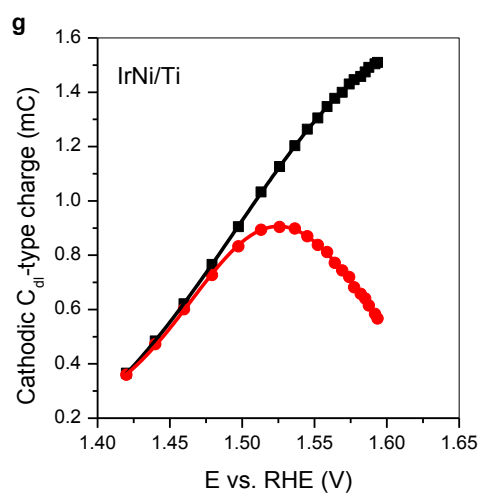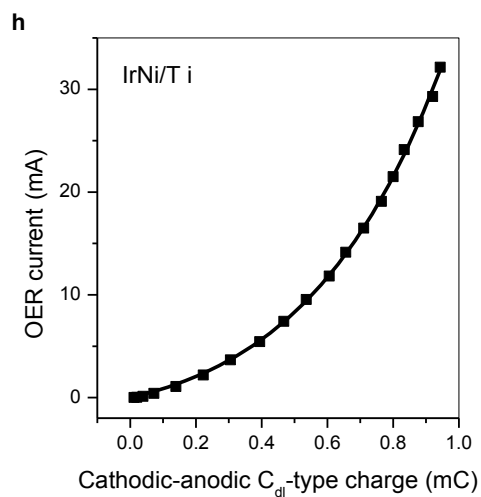



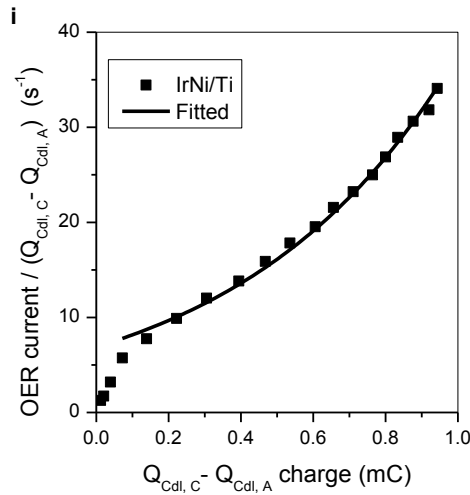

**Supplementary Fig. 4 | Measured electrocatalytic response of IrNi/Ti.** **a**, OER current versus total charge (integral cathodic charge) from pulse voltammetry, the data were from the **Supplementary Fig. 4c** in the Article<sup>1</sup> and fitted by **equation 3** in the main text (with result  $i = 2.333 \times 10^{-3} \times \exp(4.99444 \times Q) \times Q$ ). **b**, Corresponding relationship between OER current/Total charge (or  $k_{wo}$ ) and total charge with fitting result  $k_{wo} = 2.35 \times 10^{-3} \times \exp(4.99134 \times Q)$ ,  $R^2 = 0.9999$ . **c**, Total charge (integral cathodic charge) vs.  $iR$  corrected potential from pulse voltammetry, the data were from the **Supplementary Fig. 4b** in the Article<sup>1</sup> and fitted by **equation 4** in the main text (with result  $Q = 2.1049 - 1.7491 \times \exp[-((x - 1.381)/0.16279)^2]$ ). **d**, OER current versus  $iR$  corrected potential, the data were from **Supplementary Fig. 4a** in the Article<sup>1</sup> and fitted by **equation 5** in the main text (with result  $i = 2.2 \times 10^{-3} \times \exp[5.02834 \times Q(E)] \times Q(E)$ ,  $Q(E)$  parameters see **Fig. c**). **e**, OER current versus cathodic  $C_{dl}$ -type charge, the data were from **Supplementary Fig. 4d** in the Article<sup>1</sup> and fitted by **equation 3**. **f**, Corresponding relationship between OER current/cathodic  $C_{dl}$  – type charge (or  $k_{wo}$ ) and cathodic  $C_{dl}$ -type charge, fitting with a single exponential function. **g**,  $C_{dl}$ -type charge vs. the  $iR$  corrected potential, the data were from the **Supplementary Fig. 4f** in the Article<sup>1</sup> and fitted by

**equation 4. h**, OER current versus the difference between cathodic and anodic  $C_{dl}$ -type charge, the data were from **Supplementary Fig. 4g** in the Article<sup>1</sup> and fitted by **equation 3. i**, Corresponding relationship between OER current/the difference between cathodic and anodic  $C_{dl}$  – type charge and the difference between cathodic and anodic  $C_{dl}$ -type charge, fitting with a single exponential function. Sample: IrNi/Ti.

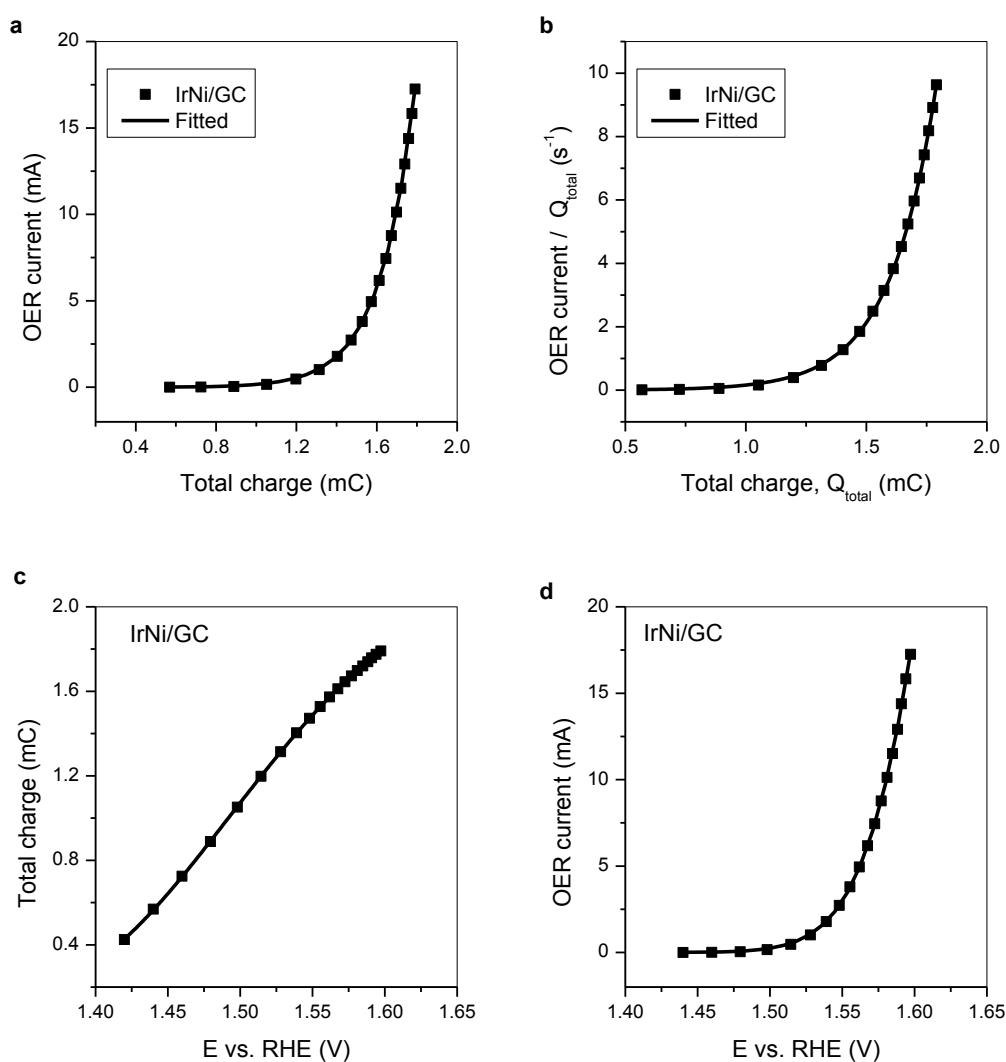

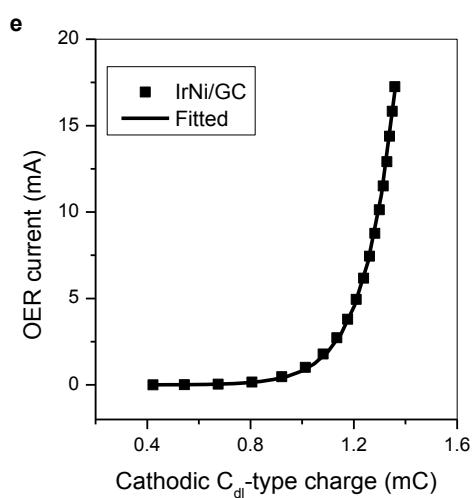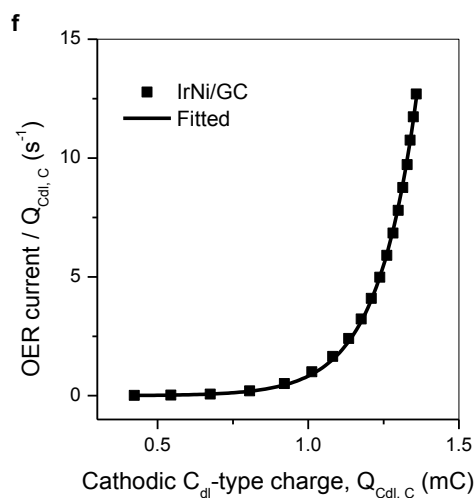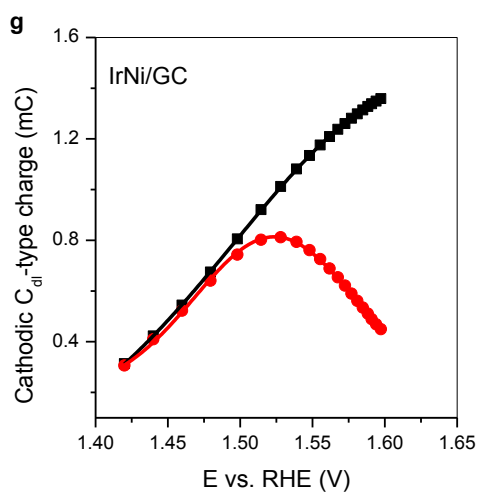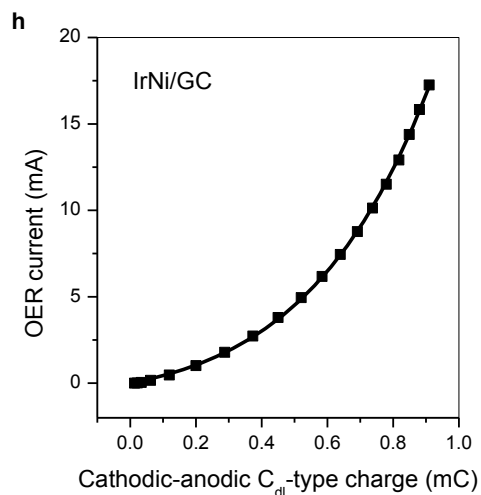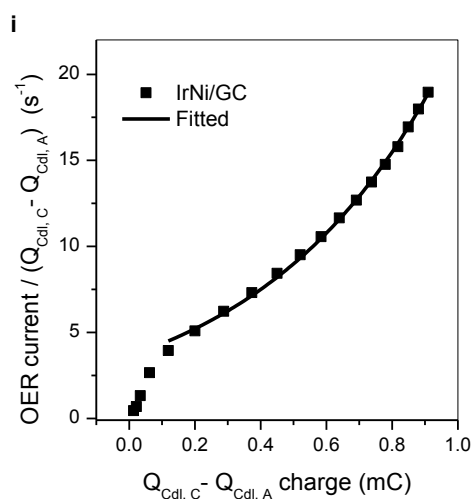

**Supplementary Fig. 5 | Measured electrocatalytic response of IrNi/GC.** **a**, OER current versus total charge (integral cathodic charge) from pulse voltammetry, the data were from **Supplementary Fig. 5c** in the Article<sup>1</sup> and fitted by **equation 3** in the main text (with result  $i = 8.948 \times 10^{-4} \times \exp(5.18545 \times Q) \times Q$ ). **b**, Corresponding relationship between OER current/Total charge (or  $k_{wo}$ ) and total charge with fitting result  $k_{wo} = 8.824 \times 10^{-4} \times \exp(5.19351 \times Q)$ ,  $R^2 = 0.9999$ . **c**, Total charge (integral cathodic charge) vs.  $iR$  corrected potential from pulse voltammetry, the data were from **Supplementary Fig. 5b** in the Article<sup>1</sup> and fitted by **equation 4** in the main text (with result  $Q = 2.2016 - 1.9852 \times \exp[-((x - 1.3553)/0.19259)^2]$ ). **d**, OER current versus  $iR$  corrected potential, the data were from **Supplementary Fig. 5a** in the Article<sup>1</sup> and fitted by **equation 5** in the main text (with result  $i = 9.152 \times 10^{-4} \times \exp[5.17114 \times Q(E)] \times Q(E)$ ,  $Q(E)$  parameters see **Fig. c**). **e**, OER current versus cathodic  $C_{dl}$ -type charge, the data were from **Supplementary Fig. 5d** in the Article<sup>1</sup> and fitted by **equation 3**. **f**, Corresponding relationship between OER current/cathodic  $C_{dl}$  – type charge (or  $k_{wo}$ ) and cathodic  $C_{dl}$ -type charge, fitting with a single exponential function. **g**,  $C_{dl}$ -type charge vs. the  $iR$  corrected potential, the data were from **Supplementary Fig. 5f** in the Article<sup>1</sup> and fitted by **equation 4**. **h**, OER current versus the difference between cathodic and anodic  $C_{dl}$ -type charge, the data were from **Supplementary Fig. 5g** in the Article<sup>1</sup> and fitted by **equation 2**. **i**, Corresponding relationship between OER current/the difference between cathodic and anodic  $C_{dl}$  – type charge and the difference between cathodic and anodic  $C_{dl}$ -type charge, fitting with a single exponential function. Sample: IrNi/GC (GC: glassy carbon).

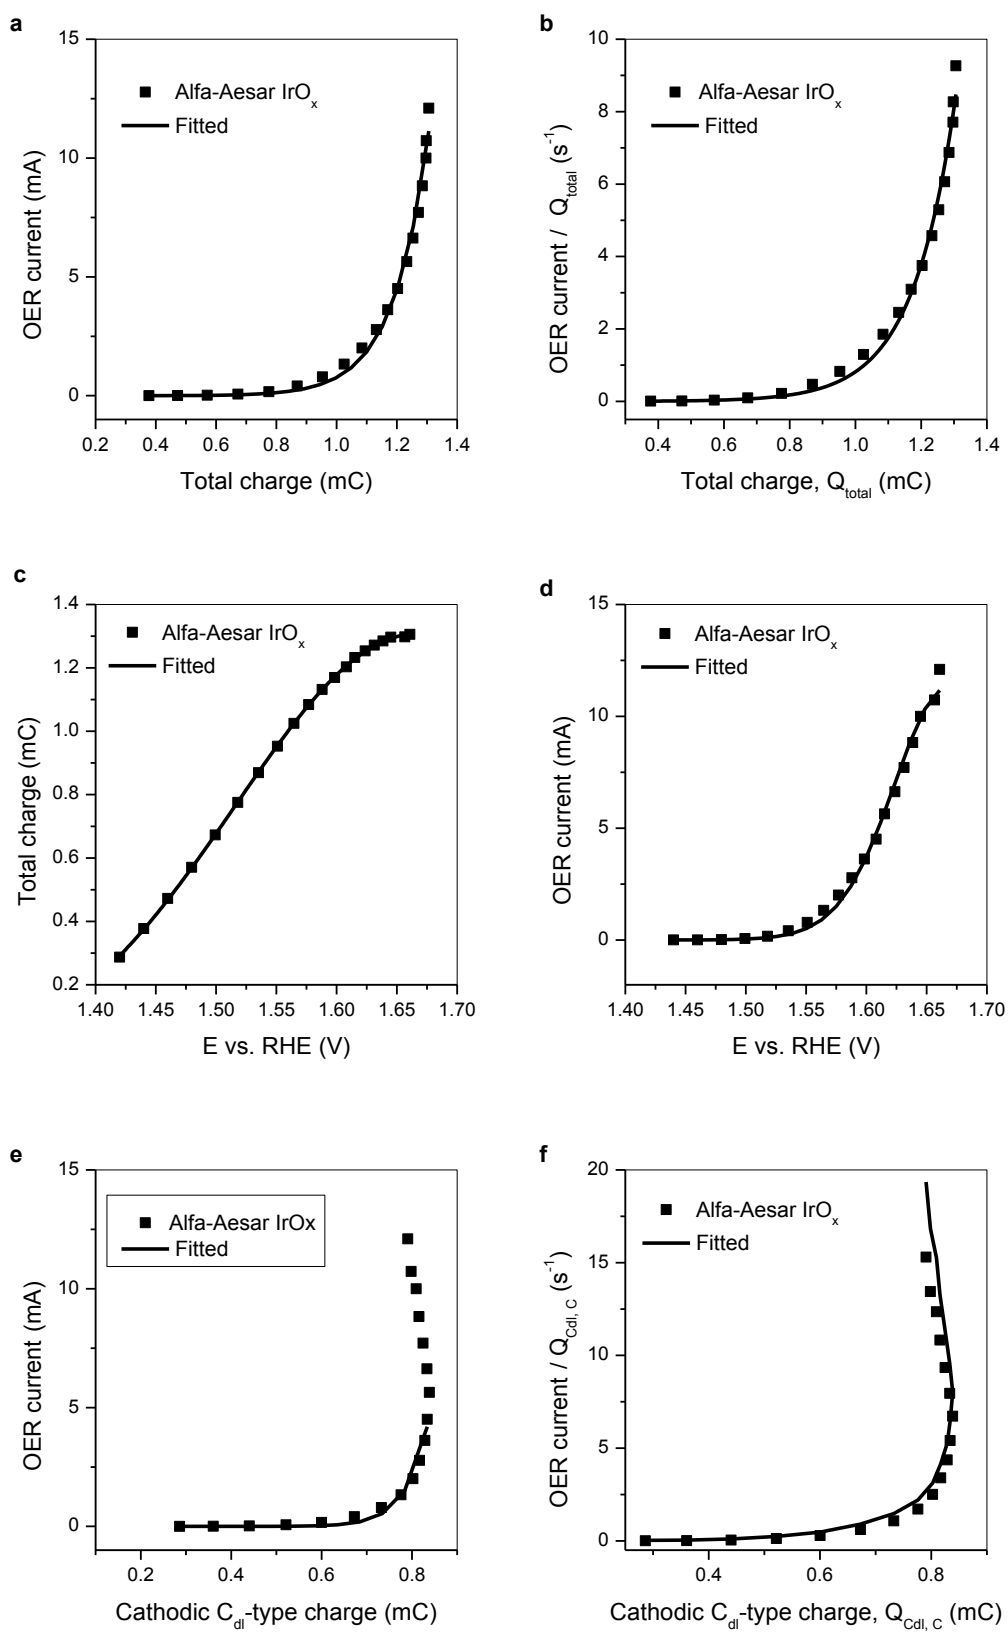

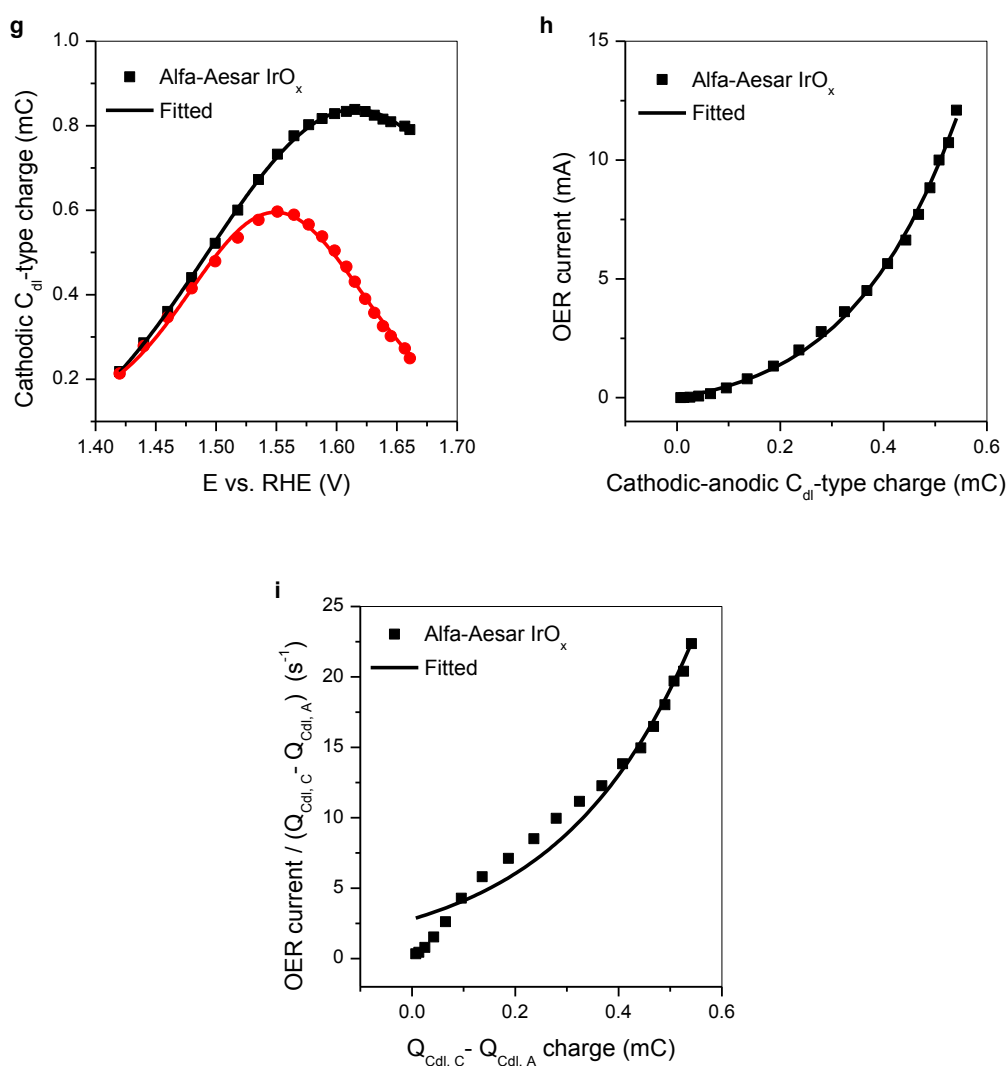

**Supplementary Fig. 6 | Measured electrocatalytic response of Alfa-Aesar IrO<sub>x</sub>.** **a**, OER current versus total charge (integral cathodic charge) from pulse voltammetry, the data were from **Supplementary Fig. 6c** in the Article<sup>1</sup> and fitted by **equation 3** in the main text (with result  $i = 2.881 \times 10^{-4} \times \exp(7.88418 \times Q) \times Q$ ). **b**, Corresponding relationship between OER current/Total charge (or  $k_{wo}$ ) and total charge with fitting result  $k_{wo} = 3.861 \times 10^{-4} \times \exp(7.65494 \times Q)$ ,  $R^2 = 0.99$ . **c**, Total charge (integral cathodic charge) vs.  $iR$  corrected potential from pulse voltammetry, the data were from **Supplementary Fig. 6b** in the Article<sup>1</sup> and fitted by **equation 4** in the main text (with result  $Q = -0.0709 + 1.3784 \times \exp[-((x - 1.6671)/$

0.21377)<sup>2</sup>]). **d**, OER current versus *iR* corrected potential, the data were from **Supplementary Fig. 6a** in the Article<sup>1</sup> and fitted by **equation 5** in the main text (with result  $i = 3.26 \times 10^{-4} \times \exp[7.78851 \times Q(E)] \times Q(E)$ ,  $Q(E)$  parameters see **Fig. c**). **e**, OER current versus cathodic  $C_{dl}$ -type charge, the data were from **Supplementary Fig. 6d** in the Article<sup>1</sup> and fitted by **equation 3**. **f**, Corresponding relationship between OER current/cathodic  $C_{dl}$  – type charge (or  $k_{wo}$ ) and cathodic  $C_{dl}$ -type charge, fitting with a single exponential function. **g**,  $C_{dl}$ -type charge vs. the *iR* corrected potential, the data were from **Supplementary Fig. 6f** in the Article<sup>1</sup> and fitted by **equation 4**. **h**, OER current versus the difference between cathodic and anodic  $C_{dl}$ -type charge, the data were from **Supplementary Fig. 6g** in the Article<sup>1</sup> and fitted by **equation 3**. **i**, Corresponding relationship between OER current/the difference between cathodic and anodic  $C_{dl}$  – type charge and the difference between cathodic and anodic  $C_{dl}$ -type charge, fitting with a single exponential function. Sample: commercial Alfa-Aesar  $\text{IrO}_x$  powder.

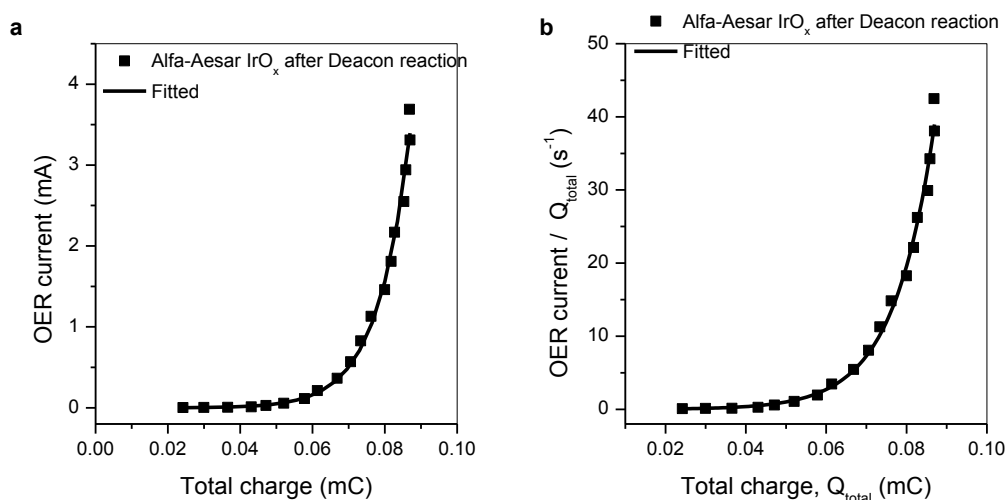

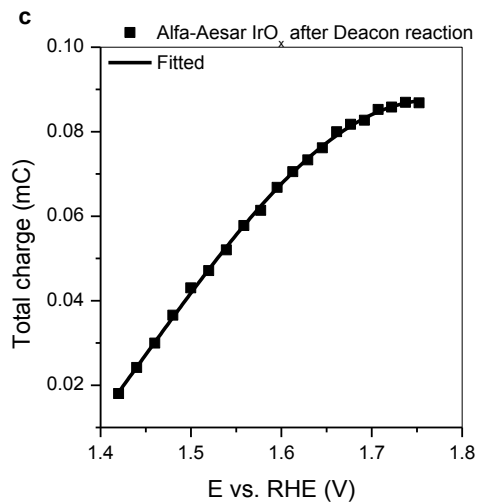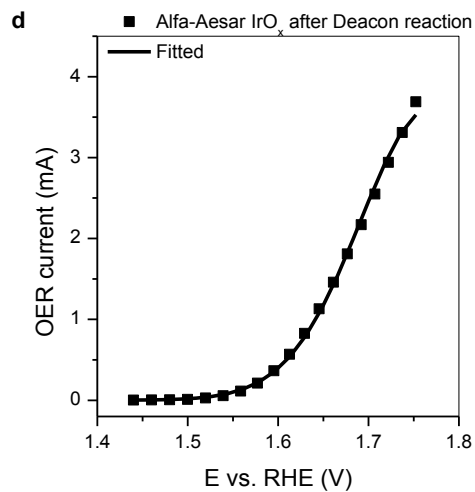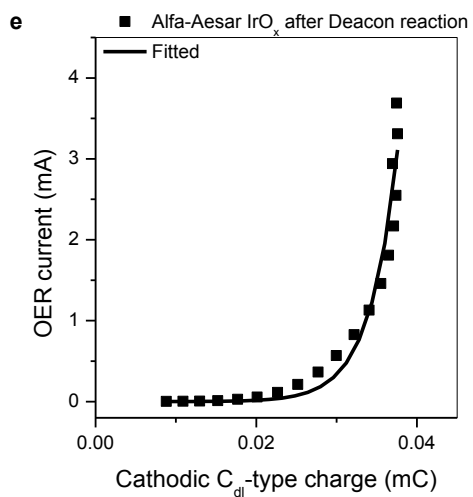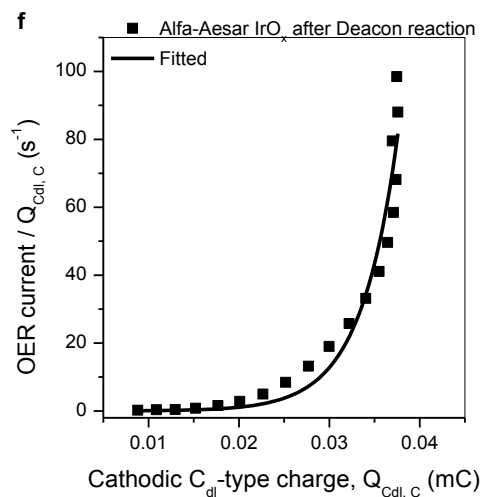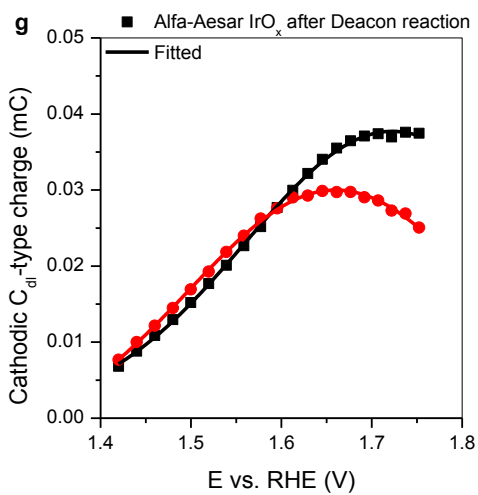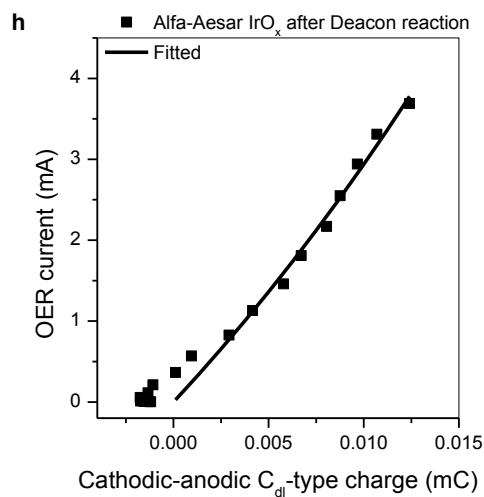



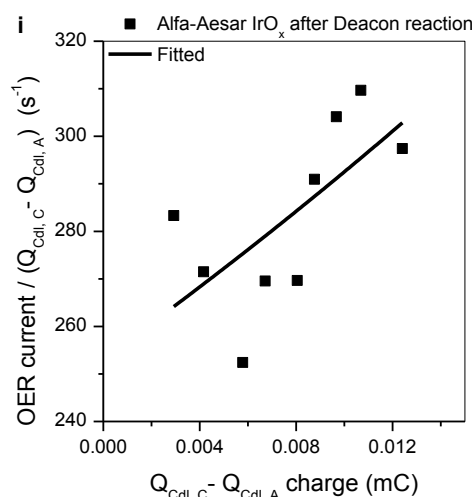

**Supplementary Fig. 7 | Measured electrocatalytic response of Alfa-Aesar IrO<sub>x</sub>**

**post-Deacon. a**, OER current versus total charge (integral cathodic charge) from pulse voltammetry, the data were from **Supplementary Fig. 7c** in the Article<sup>1</sup> and fitted by **equation 3** in the main text (with result  $i = 6.723 \times 10^{-3} \times \exp(99.6518 \times Q) \times Q$ ). **b**, Corresponding relationship between OER current/Total charge (or  $k_{wo}$ ) and total charge with fitting result  $k_{wo} = 7.29 \times 10^{-3} \times \exp(98.69792 \times Q)$ ,  $R^2 = 0.991$ . **c**, Total charge (integral cathodic charge) vs.  $iR$  corrected potential from pulse voltammetry, the data were from **Supplementary Fig. 7b** in the Article<sup>1</sup> and fitted by **equation 4** in the main text (with result  $Q = -0.0723 + 0.15982 \times \exp[-((x - 1.7687)/0.46304)^2]$ ). **d**, OER current versus  $iR$  corrected potential, the data were from **Supplementary Fig. 7a** in the Article<sup>1</sup> and fitted by **equation 5** in the main text (with result  $i = 7.501 \times 10^{-3} \times \exp[98.3939 \times Q(E)] \times Q(E)$ ,  $Q(E)$  parameters see **Fig. c**). **e**, OER current versus cathodic C<sub>dl</sub>-type charge, the data were from **Supplementary Fig. 7d** in the Article<sup>1</sup> and fitted by **equation 3**. **f**, Corresponding relationship between OER current/cathodic C<sub>dl</sub> – type charge (or  $k_{wo}$ ) and cathodic C<sub>dl</sub>-type charge, fitting with a single exponential function. **g**, C<sub>dl</sub>-type charge vs. the  $iR$  corrected

potential, the data were from **Supplementary Fig. 7f** in the Article<sup>1</sup> and fitted by **equation 4. h**, OER current versus the difference between cathodic and anodic  $C_{dl}$ -type charge, the data were from **Supplementary Fig. 7g** in the Article<sup>1</sup> and fitted by **equation 3. i**, Corresponding relationship between OER current/the difference between cathodic and anodic  $C_{dl}$  – type charge and the difference between cathodic and anodic  $C_{dl}$ -type charge, fitting with a single exponential function. Sample: commercial Alfa-Aesar  $\text{IrO}_x$  powder after treatment in the Deacon reaction.

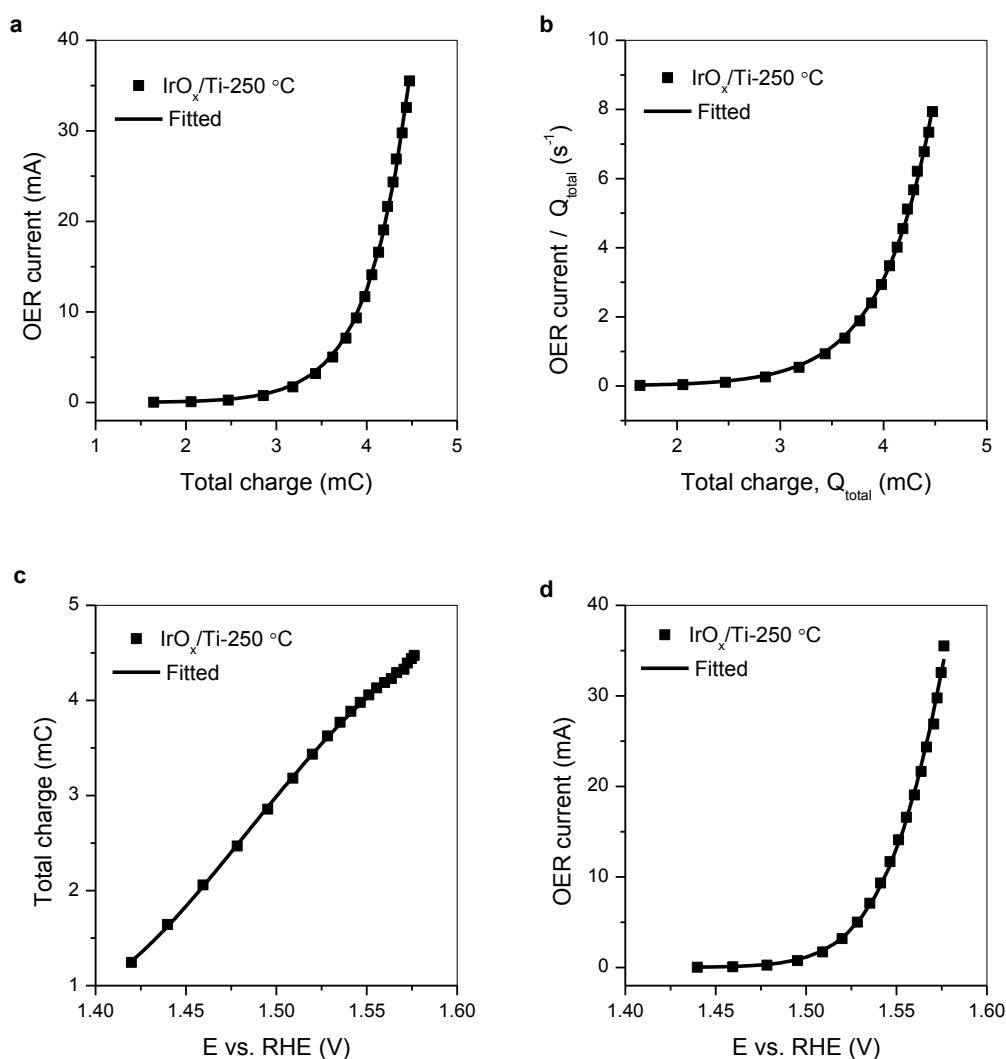

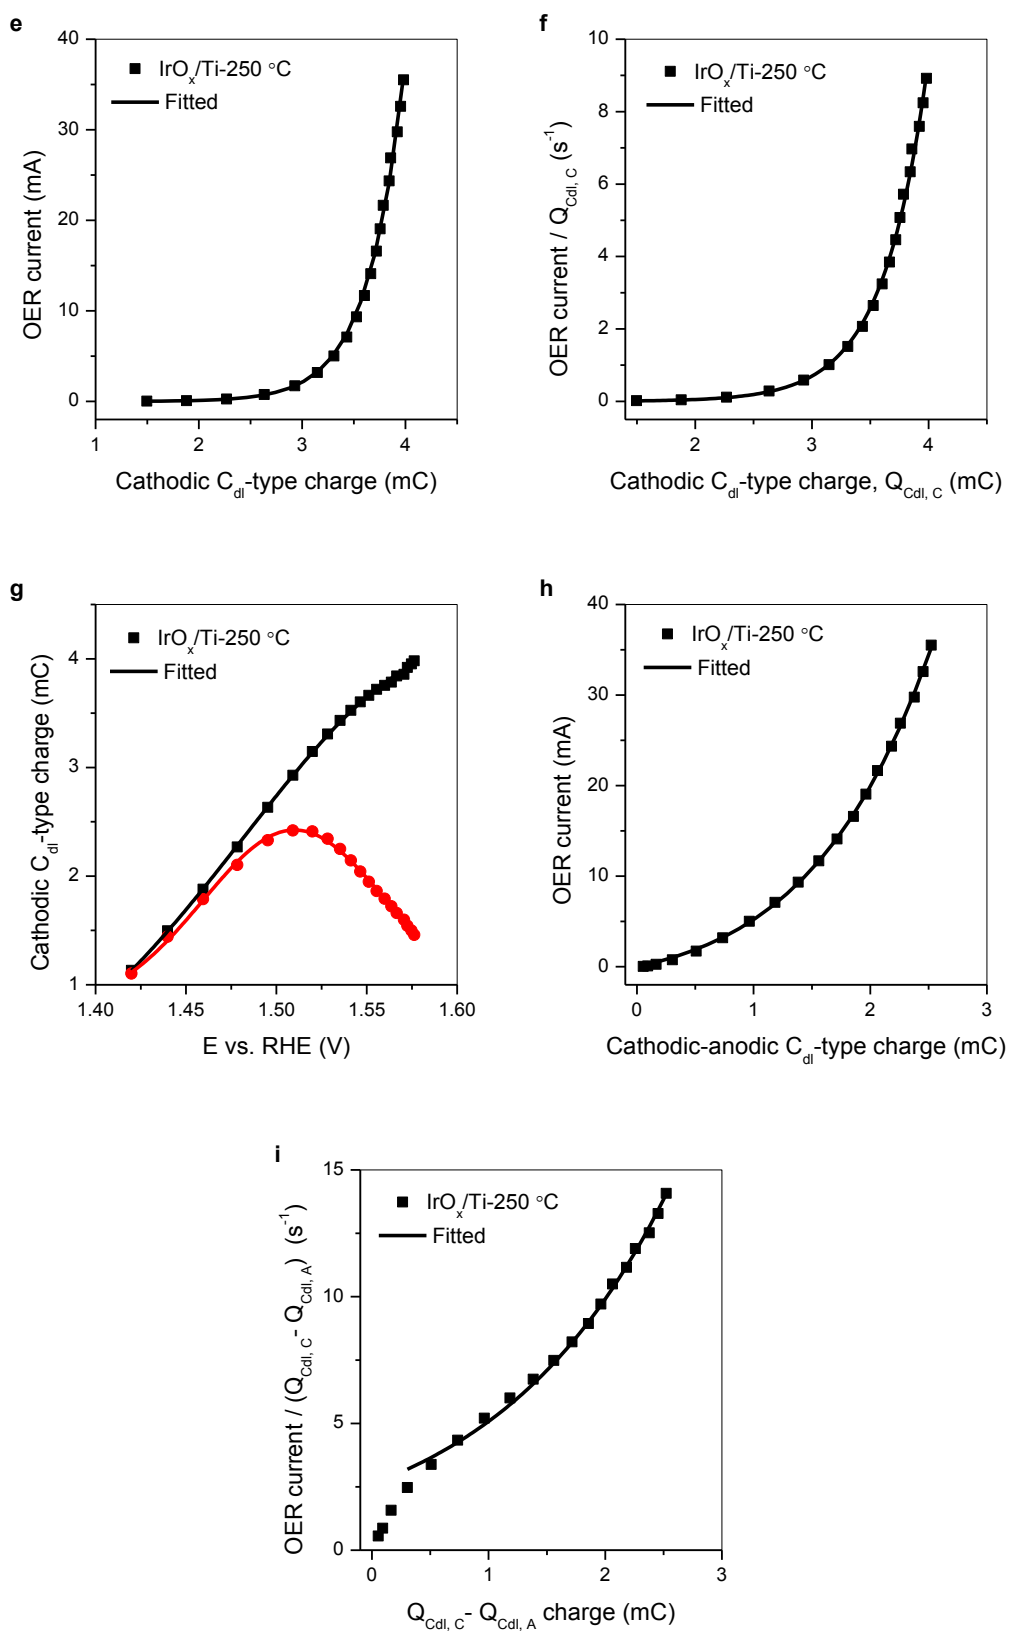

**Supplementary Fig. 8 | Measured electrocatalytic response of IrO<sub>x</sub>/Ti-250 ° C.** **a**, OER current versus total charge (integral cathodic charge) from pulse voltammetry, the data were from **Supplementary Fig. 8c** in the Article<sup>1</sup> and fitted by **equation 3** in the main text (with result  $i = 1.053 \times 10^{-3} \times \exp(1.99789 \times Q) \times Q$ ). **b**, Corresponding relationship between OER current/Total charge (or  $k_{wo}$ ) and total charge with fitting result  $k_{wo} = 9.89 \times 10^{-4} \times \exp(2.01241 \times Q)$ ,  $R^2 = 0.999$ . **c**, Total charge (integral cathodic charge) vs.  $iR$  corrected potential from pulse voltammetry, the data were from **Supplementary Fig. 8b** in the Article<sup>1</sup> and fitted by **equation 4** in the main text (with result  $Q = 5.3635 - 4.5744 \times \exp[-((x - 1.3651)/0.16654)^2]$ ). **d**, OER current versus  $iR$  corrected potential, the data were from **Supplementary Fig. 8a** in the Article<sup>1</sup> and fitted by **equation 5** in the main text (with result  $i = 8.09 \times 10^{-4} \times \exp[2.05871 \times Q(E)] \times Q(E)$ ,  $Q(E)$  parameters see **Fig. c**). **e**, OER current versus cathodic  $C_{dl}$ -type charge, the data were from **Supplementary Fig. 8d** in the Article<sup>1</sup> and fitted by **equation 3**. **f**, Corresponding relationship between OER current/cathodic  $C_{dl}$  – type charge (or  $k_{wo}$ ) and cathodic  $C_{dl}$ -type charge, fitting with a single exponential function. **g**,  $C_{dl}$ -type charge vs. the  $iR$  corrected potential, the data were from **Supplementary Fig. 8f** in the Article<sup>1</sup> and fitted by **equation 4**. **h**, OER current versus the difference between cathodic and anodic  $C_{dl}$ -type charge, the data were from **Supplementary Fig. 8g** in the Article<sup>1</sup> and fitted by **equation 3**. **i**, Corresponding relationship between OER current/the difference between cathodic and anodic  $C_{dl}$  – type charge and the difference between cathodic and anodic  $C_{dl}$ -type charge, fitting with a single exponential function. Sample: IrO<sub>x</sub>/Ti-250 ° C.

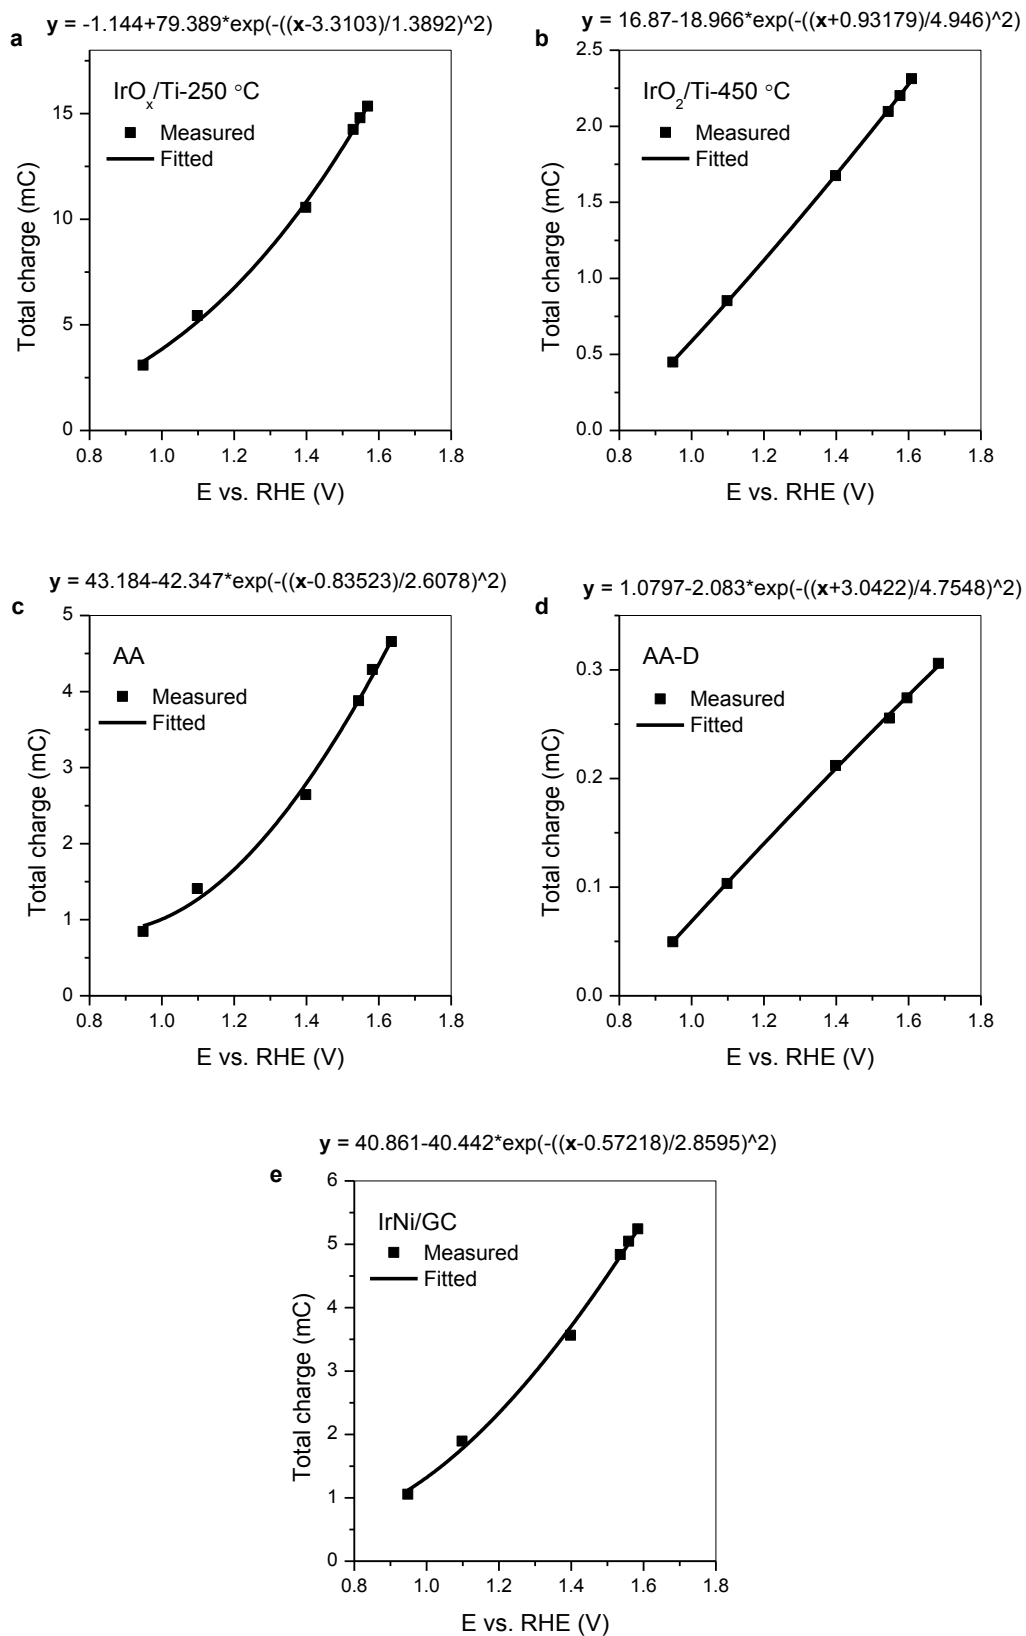

**Supplementary Fig. 9 | Total charge of selected samples.** Charge determined by integral pulse voltammetry analysis in the broad potential window. Protocol: cathodic potential: 0.75 V, anodic potentials: 0.95 V to 1.7 V non- $iR$  corrected potentials. The figure plots the  $iR$  corrected potentials. The data were from **Supplementary Fig. 10** in the Article<sup>1</sup> and fitted by **equation 4** in the main text with fitting result as marked.

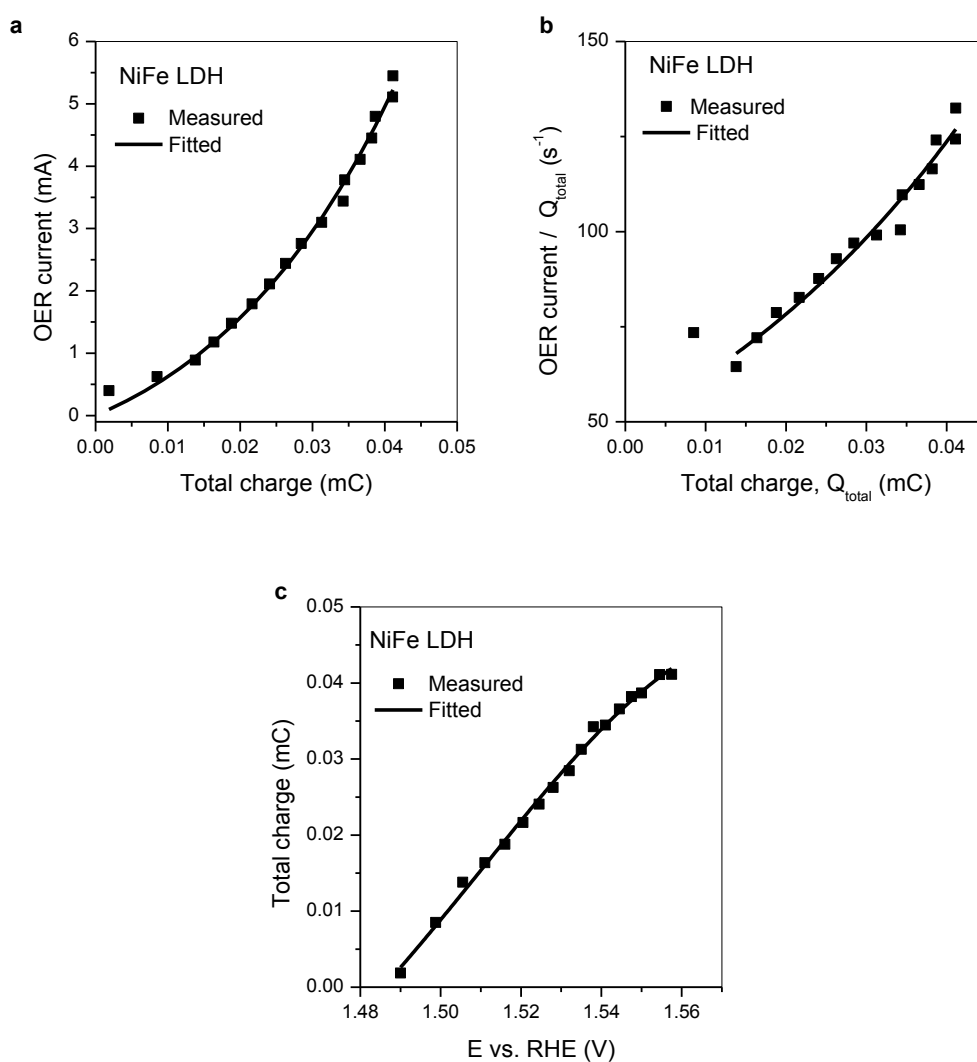

**Supplementary Fig. 10 | Electrochemical response of NiFe LDH.** **a**, OER current versus total charge (integral cathodic charge) from pulse voltammetry, the data were from **Supplementary Fig. 17a** in the Article<sup>1</sup> and fitted by **equation 3** in the main text (with result  $i = 49.677 \times \exp(22.823 \times Q) \times Q$ ). **b**, Corresponding relationship

between OER current/Total charge (or  $k_{wo}$ ) and total charge with fitting result  $k_{wo} = 49.57177 \times \exp(22.86216 \times Q)$ ,  $R^2 = 0.969$ . **c**, Total charge (integral cathodic charge) vs.  $iR$  corrected potential from pulse voltammetry, the data were from **Supplementary Fig. 17b** in the Article<sup>1</sup> and fitted by **equation 4** in the main text (with result  $Q = -0.03192 + 0.078654 \times \exp[-((x - 1.5835)/0.10298)^2]$ ). Sample: NiFe layered double hydroxide.

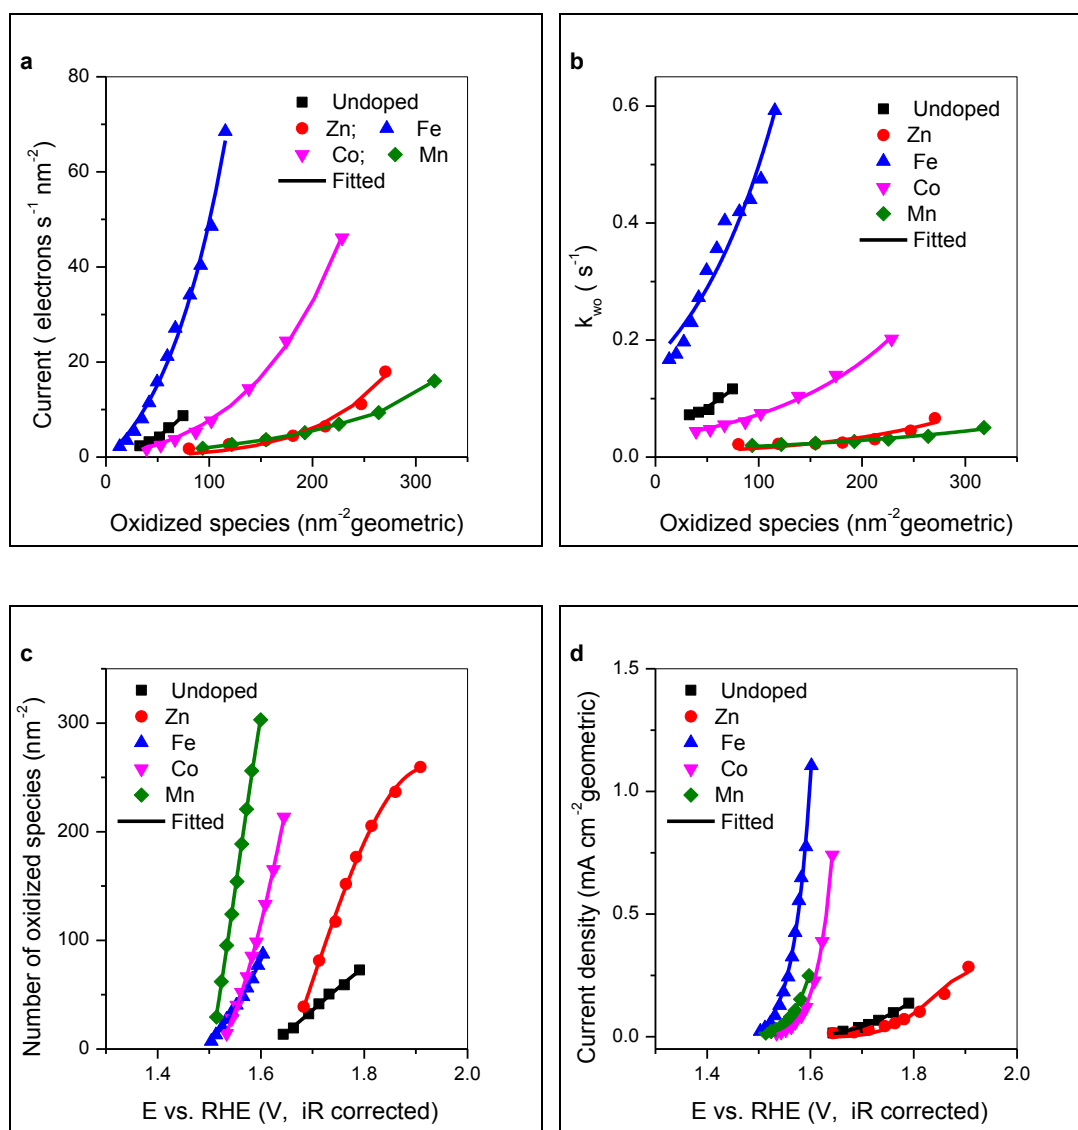

**Supplementary Fig. 11 | Measured electrocatalytic response of doped nickel oxides. a**, OER current density versus the density of oxidized species from

spectroelectrochemistry, the data were from **Fig. 3c** in the Article<sup>2</sup> and fitted by **equation 3** in the main text (with result listed in **Table S11**). **b**, Corresponding relationship between OER current/Total charge (or  $k_{wo}$ ) and total charge with fitting result with result listed in **Table S12**. **c**, Total charge (integral cathodic charge) vs.  $iR$  corrected potential from pulse voltammetry, the data were from **Supplementary Fig. 8b** in the Article<sup>2</sup> and fitted by **equation 4** in the main text (with result listed in **Table S13**). **d**, OER current versus  $iR$  corrected potential, the data were from **Supplementary Fig. 8a** in the Article<sup>2</sup> and fitted by **equation 5** in the main text (with result in **Table S14**,  $Q(E)$  parameters see **Fig. c**).

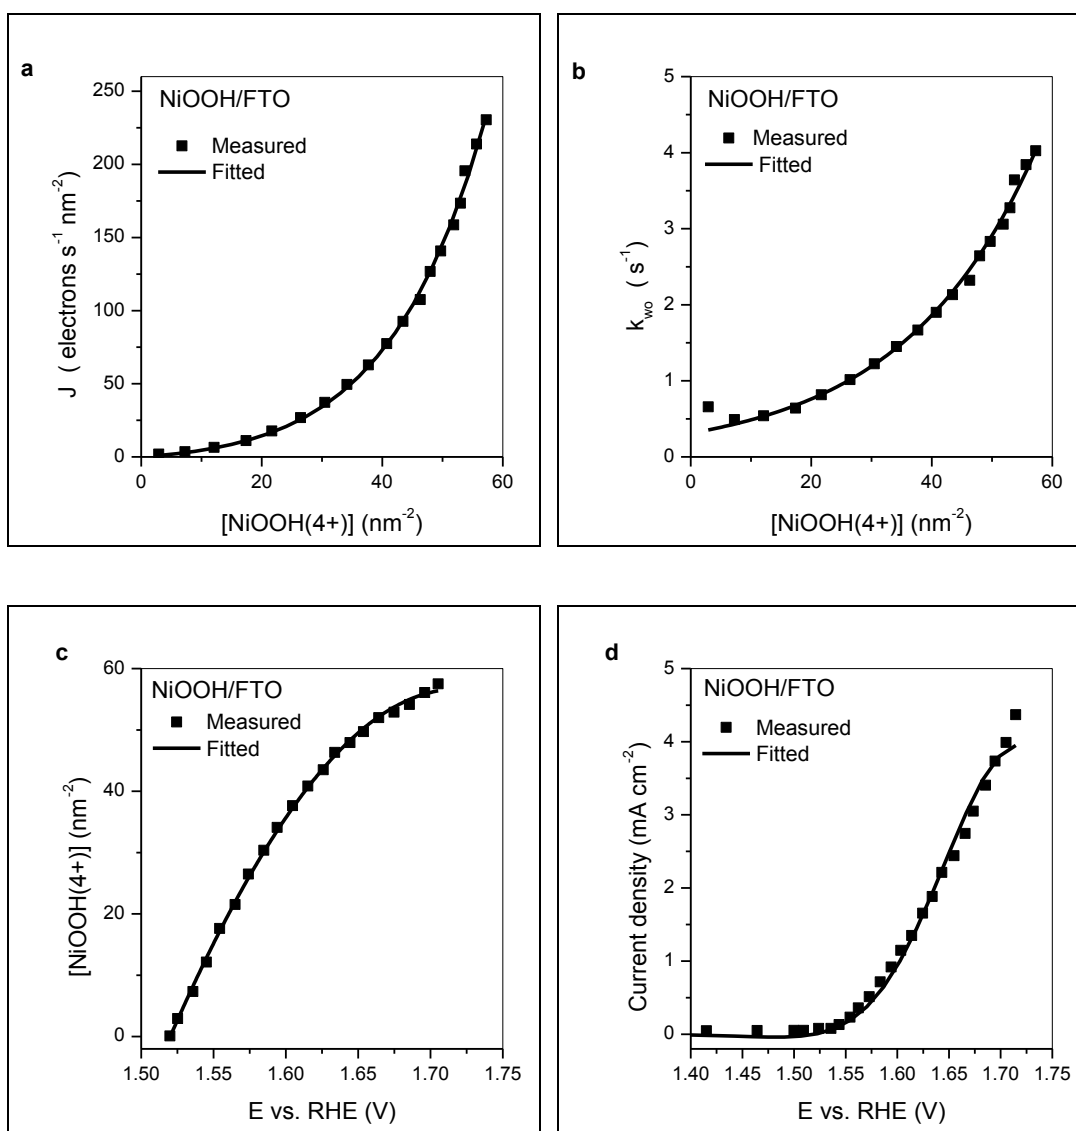



**Supplementary Fig. 12 | Measured electrocatalytic response of NiOOH/FTO electrode.** **a**, OER current density versus the concentration of NiOOH(4+) from spectroelectrochemistry, the data were from **Fig. 3a** in the Article<sup>3</sup> and fitted by **equation 3** in the main text (with result  $i = 0.281859 \times \exp(0.046648 \times Q) \times Q$ ). **b**, Corresponding relationship between OER current/[NiOOH(4+)] (or  $k_{wo}$ ) and [NiOOH(4+)] with fitting result  $k_{wo} = 0.31126 \times \exp(0.04472 \times Q)$ ,  $R^2 = 0.992$ . **c**, The concentration of NiOOH(4+) vs.  $iR$  corrected potential from spectroelectrochemistry, the data were from Supplementary Fig. 11b in the Article<sup>3</sup> and fitted by **equation 4** in the main text (with result  $Q = -494.92 + 551.58 \times \exp[-((x - 1.719)/0.60435)^2]$ ). **d**, OER current density versus  $iR$  corrected potential, the data were from **Supplementary Fig. 11b** in the Article<sup>3</sup> and fitted by **equation 5** in the main text (with result  $i = 0.004964 \times \exp[0.046665 \times Q(E)] \times Q(E)$ ,  $Q(E)$  parameters see **Fig. c**).

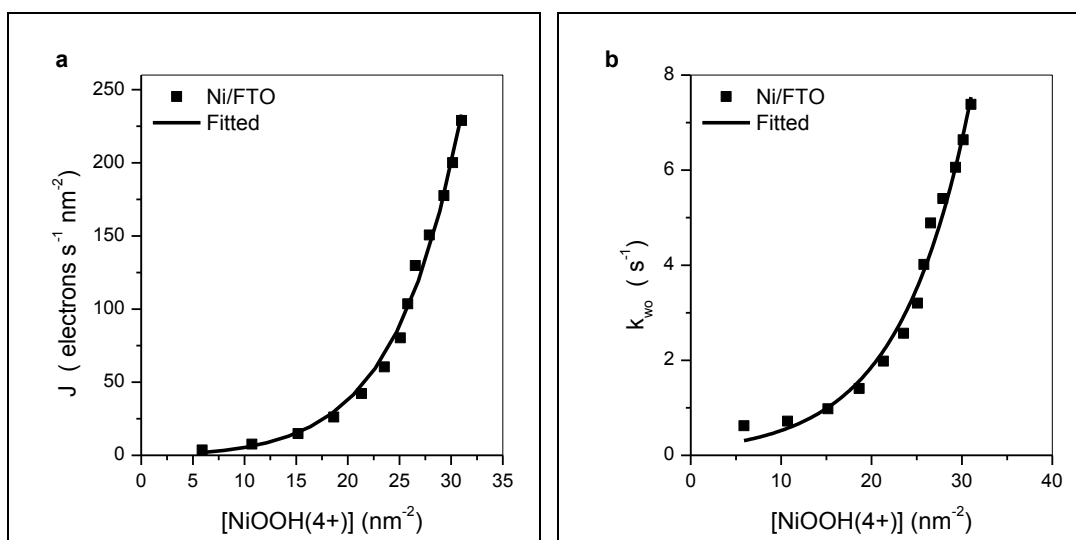

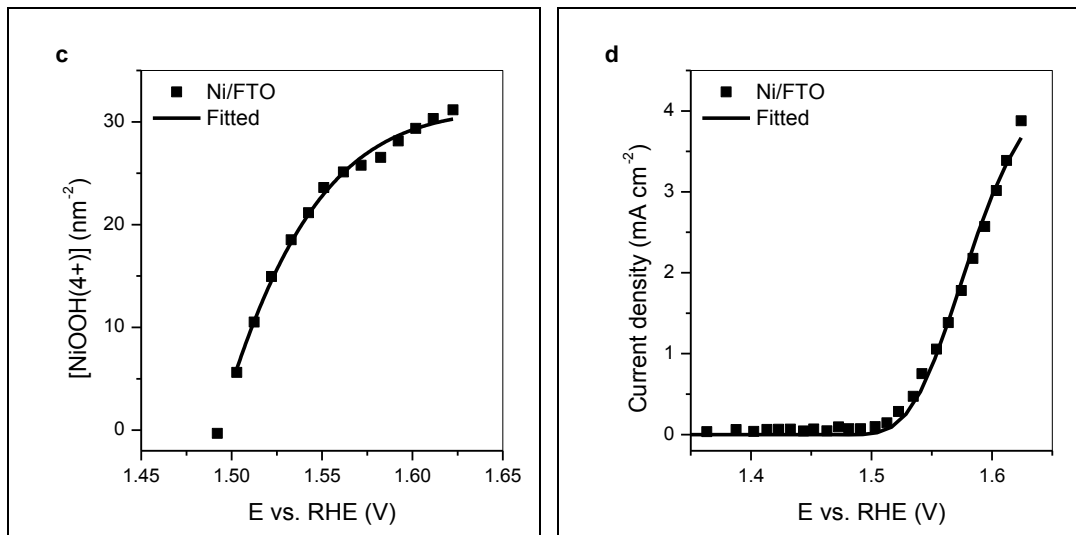

**Supplementary Fig. 13 | Measured electrocatalytic response of Ni/FTO electrode.**

**a**, OER current density versus the concentration of NiOOH(4+) from spectroelectrochemistry, the data were from **Fig. 3a** in the Article<sup>3</sup> and fitted by **equation 3** in the main text (with result  $i = 0.152998 \times \exp(0.125591 \times Q) \times Q$ ). **b**, Corresponding relationship between OER current/[NiOOH(4+)] (or  $k_{wo}$ ) and [NiOOH(4+)] with fitting result  $k_{wo} = 0.1461 \times \exp(0.12718 \times Q)$ ,  $R^2 = 0.984$ . **c**, The concentration of NiOOH(4+) vs.  $iR$  corrected potential from spectroelectrochemistry, the data were from **Supplementary Fig. 11a** in the Article<sup>3</sup> and fitted by **equation 4** in the main text (with result  $Q = 31.364 - 206.96 \times \exp[-((x - 1.2962)/0.14175)^2]$ ). **d**, OER current versus  $iR$  corrected potential, the data were from **Supplementary Fig. 11a** in the Article<sup>3</sup> and fitted by **equation 5** in the main text (with result  $i = 0.000895818 \times \exp[0.1615 \times Q(E)] \times Q(E)$ ,  $Q(E)$  parameters see **Fig. c**).

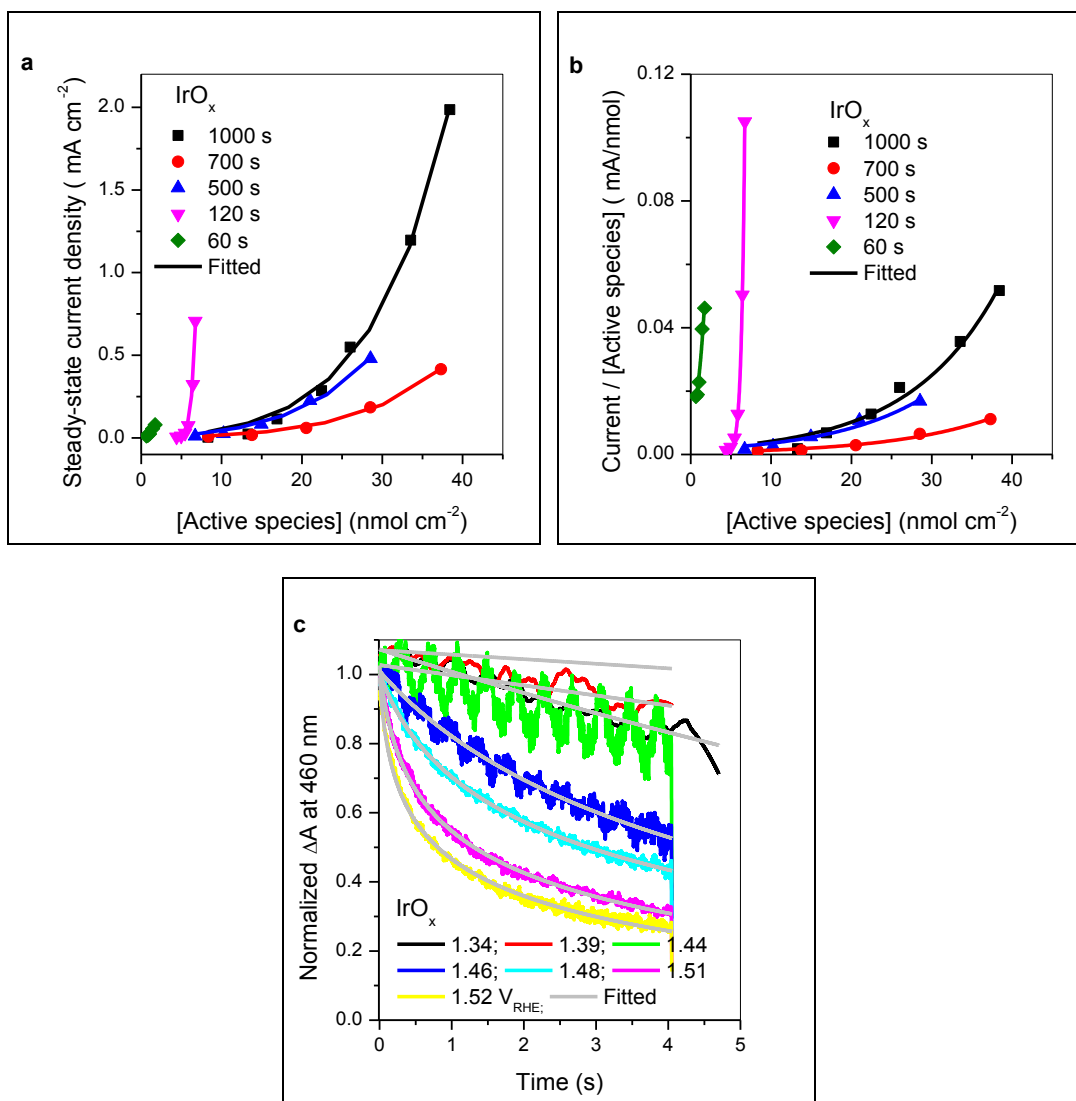

**Supplementary Fig. 14 | Measured electrocatalytic response of IrO<sub>x</sub>/FTO.** **a**, Steady-state current plotted against the concentration of active species in IrO<sub>x</sub> samples with different electrodeposition times (1000s, 700s, 500s, 120s and 60s), the data were from **Supplementary Fig. 11** in the Article<sup>4</sup> and fitted by **equation 3** in the main text (with results listed in **Table S15**). **b**, Corresponding relationship between **OER current/[active species]** (or  $k_{wo}$ ) and the concentration of active species with fitting results listed in **Table S16**. **c**, Absorption decay after turning the potential off, the data were from **Fig. 3a** in the Article<sup>4</sup> and fitted by **equation 3** in the main text (with result listed in

**Table S17).** IrO<sub>x</sub> in 0.1 M HClO<sub>4</sub> water at pH 1.2.

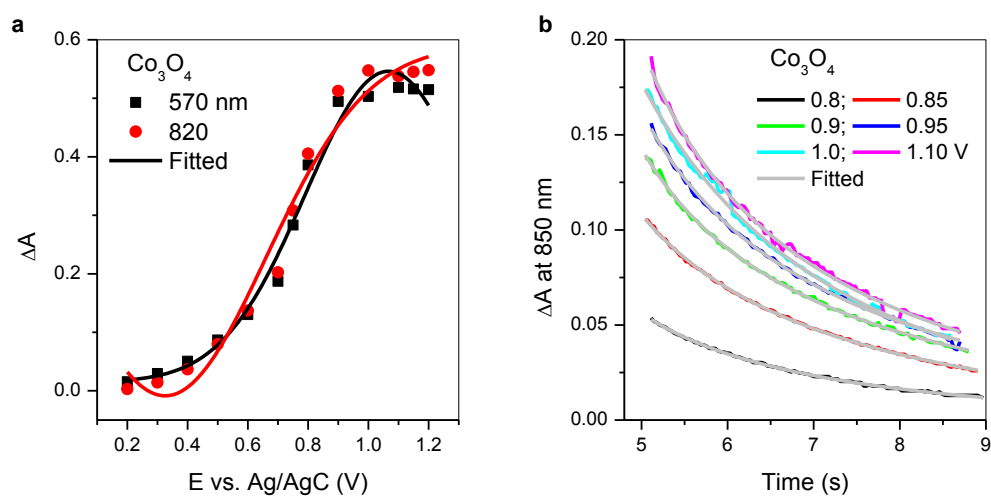

**Supplementary Fig. 15 | Potential and corresponding accumulated charge decay for Co<sub>3</sub>O<sub>4</sub> electrode.** **a**, Absorption amplitude changes at 570 and 820 nm in *in situ* electrochemical UV-vis spectra against applied potential, the data were from **Fig. S7** in the Article<sup>5</sup> and fitted by **eq 4**. **b**, Optical data at 850 nm obtained from step-potential electro-induced absorption at high potential of 0.80 V to 1.10 V *vs* Ag/AgCl (Co<sup>3+</sup>/Co<sup>4+</sup> oxidation region) with 0.75 V *vs* Ag/AgCl as low potential (baseline) and fitted by **eq 3** in the main text. The origin data were from **Supplementary Figure S9 (d)** in the Article<sup>5</sup>.

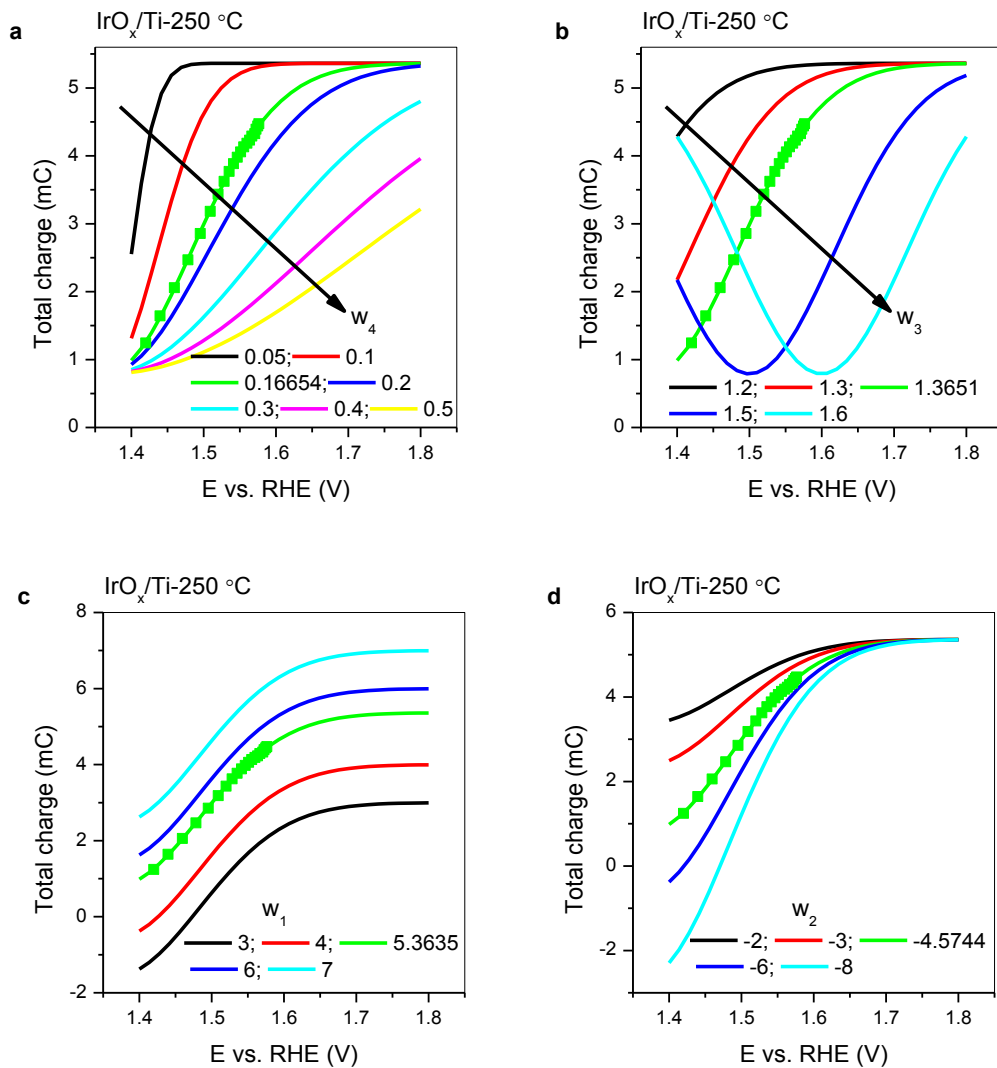

**Supplementary Fig. 16 | Simulation of equation 4 in the main text. a**, variation of parameter  $w_4$ , the green square scatter data were from **Fig. 1c** in the Article<sup>1</sup> and fitted by **equation 4** with result  $Q = 5.3635 - 4.5744 \times \exp[-((x - 1.3651)/0.16654)^2]$ , from which parameters  $w_1$ - $w_3$  are taken for simulation, kept constant and just varying parameter  $w_4$ . **b**, variation of parameter  $w_3$ , others are same as **Fig. a**. **c**, variation of parameter  $w_1$ , others are same as **Fig. a**. **d**, variation of parameter  $w_2$ , others are same as **Fig. a**.

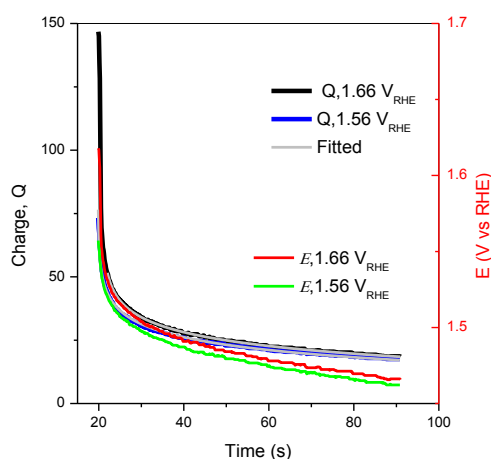

**Supplementary Fig. 17 | Potential and corresponding accumulated charge decay for  $\text{Fe}_{0.1}\text{Ni}_{0.9}\text{O}$  electrode.** Measurement was conducted for the first 10 seconds, a potential of  $1.45 \text{ V}_{\text{RHE}}$  was applied. Between 10 and 20 seconds, a potential of  $1.56 \text{ V}_{\text{RHE}}$  (green trace) and  $1.66 \text{ V}_{\text{RHE}}$  (red trace) was applied. After 20 seconds, the measurement configuration was switched to open circuit (zero current density) and the potential decay was recorded, and this decay was converted to charge decay according to **eq 4** in the main text and then fitted by **eq 3** in the main text. The origin data were from **Supplementary Figure S11** in the Article<sup>2</sup>.

## Supplementary Tables

**Table S1. Gauss fitting parameters for H<sub>2</sub>O and H<sub>2</sub>O<sub>2</sub> oxidation on IrO<sub>x</sub> electrodes<sup>a</sup>.**

| Probe wavelength<br>(nm)                              | H <sub>2</sub> O |                |                |                | H <sub>2</sub> O <sub>2</sub> |                |                |                |
|-------------------------------------------------------|------------------|----------------|----------------|----------------|-------------------------------|----------------|----------------|----------------|
|                                                       | w <sub>1</sub>   | w <sub>2</sub> | w <sub>3</sub> | w <sub>4</sub> | w <sub>1</sub>                | w <sub>2</sub> | w <sub>3</sub> | w <sub>4</sub> |
| 460                                                   | -0.03504         | 0.042728       | 1.5826         | 0.29677        | 0.054779                      | -0.05451       | 1.0429         | 0.46254        |
| 500                                                   | 0.14237          | -0.14314       | 1.2854         | 1.2297         | -                             | -              | -              | -              |
| 550                                                   | 0.1299           | -0.13059       | 1.29           | 1.2665         | -                             | -              | -              | -              |
| 600                                                   | 0.000167         | 0.005397       | 1.5887         | 0.09784        | -0.0098                       | 0.039288       | 1.6473         | 0.49821        |
| 800                                                   | 0.063945         | -0.06452       | 1.2757         | 0.86022        | -0.00388                      | 0.048809       | 1.5436         | 0.30068        |
| a-fit equation is <b>equation 4</b> in the main text. |                  |                |                |                |                               |                |                |                |

**Table S2. *i*-*E* curve fitting parameters for H<sub>2</sub>O and H<sub>2</sub>O<sub>2</sub> oxidation on IrO<sub>x</sub> electrodes<sup>a</sup>.**

| Probe wavelength<br>(nm)                                                                            | H <sub>2</sub> O      | 20 mM H <sub>2</sub> O <sub>2</sub> |                       |          |
|-----------------------------------------------------------------------------------------------------|-----------------------|-------------------------------------|-----------------------|----------|
|                                                                                                     | <i>k</i> <sub>0</sub> | <i>A</i>                            | <i>k</i> <sub>0</sub> | <i>A</i> |
| 460                                                                                                 | 0.020635              | 1088.59                             | 10.8946               | 16.8224  |
| 500                                                                                                 | 0.401423              | 882.832                             | -                     | -        |
| 550                                                                                                 | 0.582936              | 1033.98                             | -                     | -        |
| 600                                                                                                 | 0.822643              | 945.32                              | 7.22723               | 48.1676  |
| 800                                                                                                 | 0.227985              | 991.508                             | 5.54986               | 23.2735  |
| a-fit equation is <b>equation 5</b> in the main text, other fitted parameters see <b>Table S1</b> . |                       |                                     |                       |          |

**Table S3. Gauss fitting parameters for water oxidation on FeOOH, FeOOHNiOOH and Ni(Fe)OOH electrodes<sup>a</sup>.**

| electrodes                                            | $w_1$   | $w_2$   | $w_3$   | $w_4$   |
|-------------------------------------------------------|---------|---------|---------|---------|
| FeOOH                                                 | 430.4   | -431.37 | 0.29877 | 0.34602 |
| FeOOHNiOOH                                            | -11.594 | 557.38  | 0.63761 | 0.20104 |
| Ni(Fe)OOH                                             | 50.36   | -48.783 | 0.20605 | 0.19618 |
| a-fit equation is <b>equation 4</b> in the main text. |         |         |         |         |

**Table S4. *i-E* curve fitting parameters for water oxidation on FeOOH, FeOOHNiOOH and Ni(Fe)OOH electrodes<sup>a</sup>.**

| electrodes                                                                                          | $k_0$                | $A$      |
|-----------------------------------------------------------------------------------------------------|----------------------|----------|
| FeOOH                                                                                               | 0.000413             | 0.08015  |
| FeOOHNiOOH                                                                                          | 0.000197             | 0.034733 |
| Ni(Fe)OOH                                                                                           | $5.93 \cdot 10^{-5}$ | 0.201385 |
| a-fit equation is <b>equation 5</b> in the main text, other fitted parameters see <b>Table S2</b> . |                      |          |



**Table S5. Absorption decay curve fitting parameters for water oxidation on IrO<sub>x</sub> electrodes<sup>a</sup>**

| Potential                                             | ( $\Delta A$ ) <sub>0</sub> | $k_0$    | $A$     |
|-------------------------------------------------------|-----------------------------|----------|---------|
| 1.27                                                  | 1.0205                      | 0.001229 | 4.1009  |
| 1.37                                                  | 0.97951                     | 0.42779  | -2.0357 |
| 1.42                                                  | 0.99878                     | 0.17004  | -7.4755 |
| 1.47                                                  | 1.0513                      | 0.001321 | 4.4057  |
| 1.51                                                  | 1.0542                      | 0.044068 | 2.5536  |
| 1.53                                                  | 1.0674                      | 0.051599 | 3.5929  |
| 1.55                                                  | 1.0809                      | 0.046114 | 4.2046  |
| 1.59                                                  | 1.0653                      | 0.093769 | 3.3477  |
| a-fit equation is <b>equation 3</b> in the main text. |                             |          |         |

**Table S6. Absorption decay curve fitting parameters for water oxidation with H<sub>2</sub>O<sub>2</sub> on IrO<sub>x</sub> electrodes<sup>a</sup>**

| Potential                                             | ( $\Delta A$ ) <sub>0</sub> | $k_0$    | $A$     |
|-------------------------------------------------------|-----------------------------|----------|---------|
| 1.25                                                  | 1.0223                      | 0.13131  | 0.78504 |
| 1.32                                                  | 1.0155                      | 0.1445   | 0.81638 |
| 1.39                                                  | 1.0096                      | 0.085745 | 1.1108  |
| 1.44                                                  | 1.0086                      | 0.063353 | 1.3936  |
| 1.48                                                  | 1.0087                      | 0.04417  | 1.5697  |
| 1.52                                                  | 1.0073                      | 0.035508 | 1.7875  |
| 1.55                                                  | 0.99844                     | 0.050858 | 1.0508  |
| 1.58                                                  | 0.98826                     | 0.040767 | 1.0852  |
| a-fit equation is <b>equation 3</b> in the main text. |                             |          |         |

**Table S7.  $i$ - $Q$  curve fitting parameters for water oxidation on IrO<sub>x</sub>/Ti electrodes at various rotation speeds<sup>a</sup>.**

| Rotation speed (rpm)                           | $k_0$    | $A$     |
|------------------------------------------------|----------|---------|
| 800                                            | 0.000162 | 2.40839 |
| 1200                                           | 0.000217 | 2.36382 |
| 1600                                           | 0.000186 | 2.3375  |
| 2000                                           | 0.000233 | 2.29833 |
| a-fit equation is equation 3 in the main text. |          |         |

**Table S8.  $k_{wo}$ - $Q$  curve fitting parameters for water oxidation on IrO<sub>x</sub>/Ti electrodes at various rotation speeds<sup>a</sup>.**

| Rotation speed (rpm)                       | $k_0$                 | $A$     | $R^2$   |
|--------------------------------------------|-----------------------|---------|---------|
| 800                                        | $1.68 \times 10^{-4}$ | 2.39978 | 0.99953 |
| 1200                                       | $1.08 \times 10^{-4}$ | 2.53125 | 0.999   |
| 1600                                       | $1.26 \times 10^{-4}$ | 2.42845 | 0.99991 |
| 2000                                       | $1.38 \times 10^{-4}$ | 2.42052 | 0.99987 |
| a-fit equation is an exponential function. |                       |         |         |

**Table S9. Gauss fitting parameters for water oxidation on IrO<sub>x</sub>/Ti electrodes at various rotation speeds<sup>a</sup>.**

| Rotation speed (rpm) | $w_1$    | $w_2$  | $w_3$  | $w_4$   |
|----------------------|----------|--------|--------|---------|
| 800                  | -0.0541  | 2.8666 | 1.6048 | 0.17639 |
| 1200                 | -0.19143 | 4.7096 | 1.6161 | 0.1814  |
| 1600                 | -0.5651  | 5.1925 | 1.6262 | 0.20303 |

|                                                |        |         |        |         |
|------------------------------------------------|--------|---------|--------|---------|
| 2000                                           | 5.2731 | -4.5949 | 1.3534 | 0.17647 |
| a-fit equation is equation 4 in the main text. |        |         |        |         |

**Table S10.  $i$ - $E$  curve fitting parameters for water oxidation on IrO<sub>x</sub>/Ti electrodes at various rotation speeds<sup>a</sup>.**

| Rotation speed (rpm)                                                                 | $k_0$    | $A$     |
|--------------------------------------------------------------------------------------|----------|---------|
| 800                                                                                  | 0.005595 | 2.57611 |
| 1200                                                                                 | 0.003118 | 1.70396 |
| 1600                                                                                 | 0.003596 | 1.62156 |
| 2000                                                                                 | 0.002793 | 1.69296 |
| a-fit equation is equation 5 in the main text, other fitted parameters see Table S3. |          |         |

**Table S11.  $i$ - $Q$  curve fitting parameters for water oxidation on doped nickel oxides<sup>a</sup>.**

| Doped element                                  | $k_0$    | $A$        |
|------------------------------------------------|----------|------------|
| Undoped                                        | 0.044617 | 0.012899   |
| Zn                                             | 0.0036   | 0.0106     |
| Fe                                             | 0.187954 | 0.00968296 |
| Co                                             | 0.035817 | 0.0075891  |
| Mn                                             | 0.0103   | 0.0049     |
| a-fit equation is equation 3 in the main text. |          |            |

**Table S12.  $k_{wo}$ - $Q$  exponential fitting parameters for water oxidation on doped nickel oxides<sup>a</sup>.**

| Doped element | $k_0$ | $A$ | $R^2$ |
|---------------|-------|-----|-------|
|---------------|-------|-----|-------|

|                                                       |         |         |         |
|-------------------------------------------------------|---------|---------|---------|
| <b>Undoped</b>                                        | 0.04589 | 0.01245 | 0.94221 |
| <b>Zn</b>                                             | 0.00701 | 0.00789 | 0.83094 |
| <b>Fe</b>                                             | 0.16782 | 0.01089 | 0.94445 |
| <b>Co</b>                                             | 0.03269 | 0.00804 | 0.99346 |
| <b>Mn</b>                                             | 0.01197 | 0.00437 | 0.9627  |
| <b>a-fit equation is equation 3 in the main text.</b> |         |         |         |

**Table S13. Gauss fitting parameters for water oxidation on doped nickel oxides<sup>a</sup>.**

| <b>Doped element</b>                                  | $w_1$   | $w_2$   | $w_3$  | $w_4$   |
|-------------------------------------------------------|---------|---------|--------|---------|
| <b>Undoped</b>                                        | -68.063 | 174.37  | 1.959  | 0.35993 |
| <b>Zn</b>                                             | -319.81 | 579.23  | 1.9243 | 0.34814 |
| <b>Fe</b>                                             | 714.17  | -726.85 | 1.4236 | 0.47226 |
| <b>Co</b>                                             | 1455.8  | -1475.7 | 1.4663 | 0.43052 |
| <b>Mn</b>                                             | 562.6   | -669.33 | 1.4312 | 0.17227 |
| <b>a-fit equation is equation 4 in the main text.</b> |         |         |        |         |

**Table S14. *i-E* curve fitting parameters for water oxidation on doped nickel oxides<sup>a</sup>.**

| <b>Doped element</b>                                  | $k_0$                 | $A$      |
|-------------------------------------------------------|-----------------------|----------|
| <b>Undoped</b>                                        | 0.000735              | 0.013054 |
| <b>Zn</b>                                             | $6.29 \times 10^{-5}$ | 0.010821 |
| <b>Fe</b>                                             | 0.002704              | 0.018975 |
| <b>Co</b>                                             | 0.000488              | 0.009624 |
| <b>Mn</b>                                             | 0.0002                | 0.0054   |
| <b>a-fit equation is equation 3 in the main text.</b> |                       |          |

**Table S15.  $i$ - $Q$  curve fitting parameters for water electrooxidation on IrO<sub>x</sub>/FTO<sup>a</sup>.**

| Time (s)                                              | $k_0$                 | $A$      |
|-------------------------------------------------------|-----------------------|----------|
| <b>1000</b>                                           | 0.002277              | 0.081485 |
| <b>700</b>                                            | 0.00079               | 0.071123 |
| <b>500</b>                                            | 0.00206               | 0.073947 |
| <b>120</b>                                            | $1.93 \times 10^{-7}$ | 1.95772  |
| <b>60</b>                                             | 0.010165              | 0.894311 |
| <b>a-fit equation is equation 3 in the main text.</b> |                       |          |

**Table S16.  $k_{wo}$ - $Q$  exponential fitting parameters for water electrooxidation on IrO<sub>x</sub>/FTO<sup>a</sup>.**

| Time (s)                                              | $k_0$                 | $A$     | $R^2$   |
|-------------------------------------------------------|-----------------------|---------|---------|
| <b>1000</b>                                           | 0.00171               | 0.08948 | 0.97698 |
| <b>700</b>                                            | $6.24 \times 10^{-4}$ | 0.07776 | 0.98269 |
| <b>500</b>                                            | 0.00149               | 0.08597 | 0.95625 |
| <b>120</b>                                            | $7.39 \times 10^{-9}$ | 2.44847 | 0.99964 |
| <b>60</b>                                             | 0.00936               | 0.94772 | 0.95055 |
| <b>a-fit equation is equation 3 in the main text.</b> |                       |         |         |

**Table S17. Absorption decay curve fitting parameters for water electrooxidation on IrO<sub>x</sub>/FTO<sup>a</sup>.**

| Potential                                             | ( $\Delta A$ ) <sub>0</sub> | $k_0$    | $A$      |
|-------------------------------------------------------|-----------------------------|----------|----------|
| <b>1.34</b>                                           | 1.0725                      | 0.076171 | -0.19519 |
| <b>1.39</b>                                           | 1.0705                      | 0.064736 | -1.5643  |
| <b>1.44</b>                                           | 1.0274                      | 0.063145 | -0.76058 |
| <b>1.46</b>                                           | 1.0094                      | 0.059217 | 1.3708   |
| <b>1.48</b>                                           | 1.0028                      | 0.034423 | 2.7963   |
| <b>1.51</b>                                           | 1.025                       | 0.041385 | 3.7331   |
| <b>1.52</b>                                           | 0.99159                     | 0.043205 | 4.3976   |
| a-fit equation is <b>equation 3</b> in the main text. |                             |          |          |

## Supplementary References

- 1 Nong, H. N. *et al.* Key role of chemistry versus bias in electrocatalytic oxygen evolution. *Nature* **587**, 408-413, doi:10.1038/s41586-020-2908-2 (2020).
- 2 Rao, R. R. *et al.* Spectroelectrochemical Analysis of the Water Oxidation Mechanism on Doped Nickel Oxides. *J. Am. Chem. Soc.* **144**, 7622-7633, doi:10.1021/jacs.1c08152 (2022).
- 3 Yuan, Y. *et al.* Kinetics of Active Oxide Species Derived from a Metallic Nickel Surface for Efficient Electrocatalytic Water Oxidation. *ACS Energy Letters* **7**, 3276-3285, doi:10.1021/acsenenergylett.2c01493 (2022).
- 4 Bozal-Ginesta, C. *et al.* Spectroelectrochemistry of Water Oxidation Kinetics in Molecular versus Heterogeneous Oxide Iridium Electrocatalysts. *J. Am. Chem. Soc.* **144**, 8454-8459, doi:10.1021/jacs.2c02006 (2022).
- 5 Kang, W. *et al.* Unraveling Sequential Oxidation Kinetics and Determining Roles of Multi-Cobalt Active Sites on Co<sub>3</sub>O<sub>4</sub> Catalyst for Water Oxidation. *J. Am. Chem. Soc.* **145**, 3470-3477, doi:10.1021/jacs.2c11508 (2023).
